# Supplementary material for: Atomically accurate site-specific ligand tailoring of highly acid- and alkali-resistant Ti(iv)-based metallamacrocycle for enhanced CO2 photoreduction
Source: Chem Sci. 2023 Nov 30;14(48):14280–9. doi: 10.1039/d3sc06046b (PMC10718071; doi:10.1039/d3sc06046b)
Supplement: SC-014-D3SC06046B-s001 [file SC-014-D3SC06046B-s001.pdf]

## Supporting Information

# Atomically Accurate Site-Specific Ligand Tailoring of Highly Acid- and Alkali-Resistant Ti(IV)-based Metallamacrocycle for Enhanced CO<sub>2</sub> Photoreduction

Yi-Qi Tian,<sup>a,†</sup> Lin-Fang Dai,<sup>a,†</sup> Wen-Lei Mu,<sup>a</sup> Wei-Dong Yu,<sup>b</sup> Jun Yan,<sup>a\*</sup> Chao Liu<sup>a\*</sup>

<sup>a</sup>Hunan Provincial Key Laboratory of Chemical Power Sources, College of Chemistry and Chemical Engineering, Central South University, Changsha 410083, Hunan, P. R. China.

Correspondence and requests for materials should be addressed to C.L.

<sup>b</sup>China College of Science, Hunan University of Technology and Business, Changsha 410000, P. R. China.

**Abstract:** Skillfully engineering surface ligands at specific sites within robust clusters presents both a formidable challenge and a captivating opportunity. Herein we unveil an unprecedented titanium-oxo cluster: a calix[8]arene-stabilized metallamacrocycle (Ti<sub>16</sub>L<sub>4</sub>), uniquely crafted through the fusion of four "core-shell" {Ti<sub>4</sub>@(TBC[8])(L)} subunits with four oxalate moieties. Notably, this cluster showcases an exceptional level of chemical stability, retaining its crystalline integrity even when immersed in highly concentrated acid (1M HNO<sub>3</sub>) and alkali (20M NaOH). The macrocycle's surface unveils four specific, customizable μ<sub>2</sub>-bridging sites, primed to accommodate diverse carboxylate ligands. This adaptability is highlighted through deliberate modifications achieved by alternating crystal soaking in alkali and carboxylic acid solutions. Furthermore, Ti<sub>16</sub>L<sub>4</sub> macrocycles autonomously self-assemble into one-dimensional nanotubes, which subsequently organize into three distinct solid phases, contingent upon the specific nature of the four μ<sub>2</sub>-bridging ligands. Notably, the Ti<sub>16</sub>L<sub>4</sub> exhibit a remarkable capacity for photocatalytic activity in selectively reducing CO<sub>2</sub> to CO. Exploiting the macrocycle's modifiable shell yields a significant boost in performance, achieving an exceptional maximum CO release rate of 4.047 ± 0.243 mmol g<sup>-1</sup> h<sup>-1</sup>. This study serves as a striking testament to the latent potential of precision-guided surface ligand manipulation within robust clusters, while also underpinning a platform for producing microporous materials endowed with a myriad of surface functionalities.

## Contents

|                                                                                       |    |
|---------------------------------------------------------------------------------------|----|
| 1. Experimental section.....                                                          | 1  |
| 2. Detailed Structure Information for Ti <sub>16</sub> L <sub>4</sub> compounds. .... | 7  |
| 3. Powder X-ray diffraction.....                                                      | 16 |
| 4. XPS Measurement .....                                                              | 19 |
| 5. TG-Measurement.....                                                                | 20 |
| 6. IR spectra.....                                                                    | 21 |
| 7. Energy Dispersive X-ray (EDX) Spectroscopic Analysis .....                         | 22 |
| 8. CO <sub>2</sub> adsorption.....                                                    | 23 |
| 9. Dynamic Light Scattering Measurement .....                                         | 23 |
| 10. Wettability of Ti <sub>16</sub> L <sub>4</sub> rings.....                         | 24 |
| 11. Photocatalysis .....                                                              | 24 |

## 1. Experimental section

**Materials and Characterization.** All reagents were purchased commercially and were not further purified when used. Powder X-ray diffraction (PXRD) analysis were performed on a Rigaku Mini Flex II diffractometer at a  $2\theta$  range of  $5\text{--}50^\circ$  ( $5^\circ \text{ min}^{-1}$ ) with  $\text{CuK}\alpha$  radiation ( $\lambda = 1.54056 \text{ \AA}$ ). The solid-state UV/Vis spectra data of the cluster samples were obtained on UV-4000 spectrophotometer. The diameters of cluster were measured by DLS using a Zetasizer Nano ZS90 (Malvern Instruments, UK). The measurements were conducted at a scattering angle of  $90^\circ$  at  $25^\circ \text{C}$ . The measurements were repeated thrice for each sample.

**Synthesis for  $[\text{H}_4\text{Ti}_{16}\text{O}_8(\text{TBC}[8])_4(\text{C}_2\text{O}_4)_4(\text{Ac})_4(\text{O}^i\text{Pr})_8]\cdot^i\text{PrOH}\cdot 13\text{CH}_3\text{CN}$  (**Ti<sub>16</sub>L4-1**):** TBC[8] (28 mg, 0.021 mmol), Oxalic acid (27mg, 0.3 mmol),  $\text{Eu}(\text{Ac})_3$  (33.4mg, 0.1mmol), and  $\text{CH}_3\text{CN}$  (5 mL) were added into a 25 mL Teflon lined stainless steel autoclave, and then added with  $\text{Ti}(\text{O}^i\text{Pr})_4$  (200  $\mu\text{L}$ , 0.65 mmol). The solution was sonicated for 5 min, then transferred to an oven at  $120^\circ \text{C}$  for 3 days. After it cool to room temperature, red stripe crystals of **Ti<sub>16</sub>L4-1** were obtained. yield: 40% based on  $\text{Ti}(\text{O}^i\text{Pr})_4$ . The crystals are rinsed with  $\text{CH}_3\text{CN}$  and preserved under a sealed and dry environment. Elemental analysis calcd. (%) for  $\text{C}_{423}\text{H}_{529}\text{N}_{14}\text{O}_{73}\text{Ti}_{16}$ : C 65.60, H 6.88; found: C 64.63, H 6.57.

**Synthesis for  $[\text{H}_4\text{Ti}_{16}\text{O}_8(\text{TBC}[8])_4(\text{C}_2\text{O}_4)_4(\text{Ac})_2\text{Cl}_2(\text{O}^i\text{Pr})_8]\cdot 56\text{CH}_3\text{CN}$  (**Ti<sub>16</sub>L4-2**):** TBC[8](28 mg, 0.021 mmol), Oxalic acid (27mg, 0.3 mmol),  $\text{EuCl}_3$ (25.8mg, 0.1mmol),  $\text{Eu}(\text{Ac})_3$ (15mg, 0.045mmol) and  $\text{CH}_3\text{CN}$  (5 mL) were added into a 25 mL Teflon lined stainless steel autoclave, and then added with  $\text{Ti}(\text{O}^i\text{Pr})_4$  (200  $\mu\text{L}$ , 0.65 mmol). The solution was sonicated for 5 min, then transferred to an oven at  $120^\circ \text{C}$  for 3 days. After it cool to room temperature, red stripe crystals of **Ti<sub>16</sub>L4-2** were obtained. yield: 32% based on  $\text{Ti}(\text{O}^i\text{Pr})_4$ . The crystals are rinsed with  $\text{CH}_3\text{CN}$  and preserved under a sealed and dry environment. Elemental analysis calcd. (%) for  $\text{C}_{506}\text{H}_{648}\text{Cl}_2\text{N}_{59}\text{O}_{68}\text{Ti}_{16}$ : C 64.09, H 6.89; found: C 63.29, H 6.51.

**Synthesis for  $[\text{H}_4\text{Ti}_{16}\text{O}_8(\text{TBC}[8])_4(\text{C}_2\text{O}_4)_4\text{Cl}_4(\text{O}^i\text{Pr})_8]\cdot 24\text{CH}_3\text{CN}$  (**Ti<sub>16</sub>L4-3**) :** TBC[8] (28 mg, 0.021 mmol), Oxalic acid (27mg, 0.3 mmol),  $\text{EuCl}_3$ (25.8mg, 0.1mmol) and  $\text{CH}_3\text{CN}$  (5 mL) were added into a 25 mL Teflon lined stainless steel autoclave, and

then added with  $\text{Ti}(\text{O}^i\text{Pr})_4$  (200  $\mu\text{L}$ , 0.65 mmol). The solution was sonicated for 5 min, then transferred to an oven at 120 °C for 3 days. After it cool to room temperature, red stripe crystals of **Ti<sub>16</sub>L4-3** were obtained. yield: 12% based on  $\text{Ti}(\text{O}^i\text{Pr})_4$ . The crystals are rinsed with  $\text{CH}_3\text{CN}$  and preserved under a sealed and dry environment. Elemental analysis calcd. (%) for  $\text{C}_{432}\text{H}_{536}\text{Cl}_4\text{N}_{24}\text{O}_{64}\text{Ti}_{16}$ : C 64.88, H 6.76; found: C 64.13, H 6.24.

**Synthesis for**  $[\text{Ti}_{16}\text{O}_8(\text{TBC}[8])_4(\text{C}_2\text{O}_4)_4(\text{Ac})_4(\text{O}^i\text{Pr})_4(\text{H}_2\text{O})_4]\cdot 23\text{H}_2\text{O}$  (**Ti<sub>16</sub>L4-1(a)**): 20 mg crystal of **Ti<sub>16</sub>L4-1** was immersed in 1M formic acid solution. After soaking for 24 hours, the red crystals of **Ti<sub>16</sub>L4-1(a)** were collected by filtration and washed with deionized water for three times.

**Synthesis for**  $[\text{Ti}_{16}\text{O}_8(\text{TBC}[8])_4(\text{C}_2\text{O}_4)_4(\text{Fa})_4(\text{O}^i\text{Pr})_4(\text{H}_2\text{O})_4]\cdot 3\text{CH}_3\text{CN}\cdot 24\text{H}_2\text{O}$  (**Ti<sub>16</sub>L4-1/HFa(a)**): 20 mg crystal of **Ti<sub>16</sub>L4-1** was immersed in 5M formic acid solution. After soaking for 24 hours, the red crystals of **Ti<sub>16</sub>L4-1/HFa(a)** were collected by filtration and washed with deionized water for three times.

**Synthesis for**  $[\text{Na}_8\text{Ti}_{16}\text{O}_8(\text{TBC}[8])_4(\text{C}_2\text{O}_4)_4(\text{OH})_{16}(\text{H}_2\text{O})_{12}(\text{CH}_3\text{CN})]\cdot 2\text{CH}_3\text{CN}\cdot 55\text{H}_2\text{O}$  (**Ti<sub>16</sub>L4-1/NaOH**): 20 mg crystal of **Ti<sub>16</sub>L4-1** was immersed in 5M NaOH. The color of the crystal gradually changes from red to yellow. After soaking for 30min, the yellow crystals of **Ti<sub>16</sub>L4-1/NaOH** were collected by filtration and washed with deionized water for three times.

**Synthesis for**  $[\text{Na}_4\text{Ti}_{16}\text{O}_8(\text{TBC}[8])_4(\text{C}_2\text{O}_4)_4(\text{Fa})_4(\text{OH})_8(\text{H}_2\text{O})_4]\cdot 34\text{H}_2\text{O}$  (**Ti<sub>16</sub>L4-1/HFa(b)**): 20mg crystal of **Ti<sub>16</sub>L4-1/NaOH** was immersed in 1M formic acid solution. The color of the crystal gradually changes from yellow to red. After soaking for 30min, the yellow crystals of **Ti<sub>16</sub>L4-1/HFa(b)** were collected by filtration and washed with deionized water for three times.

**Synthesis for**  $[\text{Ti}_{16}\text{O}_8(\text{TBC}[8])_4(\text{C}_2\text{O}_4)_4(\text{Cla})_4(\text{O}^i\text{Pr})_4(\text{H}_2\text{O})_4]\cdot 38\text{H}_2\text{O}$  (**Ti<sub>16</sub>L4-1/HCla**): 20mg crystal of **Ti<sub>16</sub>L4-1** was immersed in 5M chloroacetic acid solution. After soaking for 24 hours, the red crystals of **Ti<sub>16</sub>L4-1/HCla** were collected by filtration and washed with deionized water for three times.

**Synthesis for**  $[\text{Ti}_{16}\text{O}_8(\text{TBC}[8])_4(\text{C}_2\text{O}_4)_4(\text{Bra})_4(\text{O}^i\text{Pr})_4(\text{H}_2\text{O})_4]\cdot 38\text{H}_2\text{O}$  (**Ti<sub>16</sub>L4-1/HBra**): 20mg crystal of **Ti<sub>16</sub>L4-1** was immersed in 5M trifluoroacetic acid solution.

After soaking for 24 hours, the red crystals of **Ti<sub>16</sub>L<sub>4</sub>-1**/HBra were collected by filtration and washed with deionized water for three times.

**Synthesis for**  $[\text{Na}_2\text{Ti}_{16}\text{O}_8(\text{TBC}[\text{8}])_4(\text{C}_2\text{O}_4)_4(\text{Ac})_{10}(\text{HAc})_6] \cdot 2\text{HAc} \cdot 49\text{H}_2\text{O}$  (**Ti<sub>16</sub>L<sub>4</sub>-1**/HAc): 20mg crystal of **Ti<sub>16</sub>L<sub>4</sub>-1**/NaOH was immersed in 1M acetic acid solution, and the crystal color gradually changes from red to yellow. After soaking for 30min, the red crystals of **Ti<sub>16</sub>L<sub>4</sub>-1**/HAc were collected by filtration and washed with deionized water for three times.

**Synthesis for**  $[\text{Na}_4\text{Ti}_{16}\text{O}_8(\text{TBC}[\text{8}])_4(\text{C}_2\text{O}_4)_4(\text{Ama})_8(\text{H}_2\text{O})_{12}]$  (**Ti<sub>16</sub>L<sub>4</sub>-1**/HAma): 20mg crystal of **Ti<sub>16</sub>L<sub>4</sub>-1**/NaOH was immersed in 1M aminoacetic acid solution, and the crystal color gradually changed from yellow to red after 30 min. The red crystals of **Ti<sub>16</sub>L<sub>4</sub>-1**/HAma were collected by filtration and washed with deionized water for three times.

**Synthesis for**  $[\text{Ti}_{16}\text{O}_8(\text{TBC}[\text{8}])_4(\text{C}_2\text{O}_4)_4(\text{Oa})_4(\text{OH})_4(\text{H}_2\text{O})_4] \cdot 49\text{H}_2\text{O}$  (**Ti<sub>16</sub>L<sub>4</sub>-1**/H<sub>2</sub>Oa): 20mg crystal of **Ti<sub>16</sub>L<sub>4</sub>-1**/NaOH was immersed in 1M oxalic acid solution, and the crystal color gradually changed from yellow to red. After soaking for 30min, the red crystals of **Ti<sub>16</sub>L<sub>4</sub>-1**/H<sub>2</sub>Oa were collected by filtration and washed with deionized water for three times.

**Synthesis for**  $[\text{Ti}_{16}\text{O}_8(\text{TBC}[\text{8}])_4(\text{C}_2\text{O}_4)_4(\text{Ga})_4(\text{OH})_4(\text{H}_2\text{O})_4] \cdot 2\text{CH}_3\text{CN} \cdot 45\text{H}_2\text{O}$  (**Ti<sub>16</sub>L<sub>4</sub>-1**/HGa): 20mg crystal of **Ti<sub>16</sub>L<sub>4</sub>-1**/NaOH was immersed in 1M glycolic acid solution, and the crystal color changed from yellow to red. After soaking for 30min, the red crystals of **Ti<sub>16</sub>L<sub>4</sub>-1**/HGa were collected by filtration and washed with deionized water for three times.

**Synthesis for**  $[\text{Ti}_{16}\text{O}_8(\text{TBC}[\text{8}])_4(\text{C}_2\text{O}_4)_4(\text{Tfa})_4(\text{O}^i\text{Pr})_4(\text{H}_2\text{O})_4] \cdot 38\text{H}_2\text{O}$  (**Ti<sub>16</sub>L<sub>4</sub>-12**/HTfa): 20mg crystal of **Ti<sub>16</sub>L<sub>4</sub>-2** was immersed in 5M trifluoroacetic acid solution. After soaking for 24 hours, the red crystals of **Ti<sub>16</sub>L<sub>4</sub>-1**/HTfa were collected by filtration and washed with deionized water for three times.

**Synthesis for**  $[\text{Ti}_{16}\text{O}_8(\text{TBC}[\text{8}])_4(\text{C}_2\text{O}_4)_4(\text{OH})_8(\text{H}_2\text{O})_4] \cdot 4\text{H}_2\text{O}$  (**Ti<sub>16</sub>L<sub>4</sub>-1**/H<sub>3</sub>PO<sub>4</sub>): 20mg crystal of **Ti<sub>16</sub>L<sub>4</sub>-1**/NaOH was immersed in 1M phosphoric acid solution, and the crystal color changed from yellow to red. After soaking for 30min, the red crystals of

**Ti<sub>16</sub>L<sub>4</sub>-1**/OH<sup>-</sup> were collected by filtration and washed with deionized water for three times.

**X-ray Crystallographic Analyses.** Crystallographic data of all the crystals were collected on Bruker D8 Venture diffractometer with liquid metal Ga-K $\alpha$  radiation ( $\lambda = 1.3405 \text{ \AA}$ ) at about 100 K. Absorption correction was applied using SADABS.<sup>1</sup> The structures were solved with the dual-direct methods using ShelxT and refined with the full-matrix least-squares technique based on  $F^2$  using the SHELXL-2014.<sup>2, 3</sup> Non-hydrogen atoms were refined anisotropically. Due to the rotation disorder of tert-butyl groups, in all cases the ISOR, DELU and SIMU constraints were necessary to achieve convergence. Hydrogen atoms were added theoretically, riding on the concerned atoms and refined with fixed thermal factors. Hydrogen atoms bonded to oxygen (water and hydroxyl ions) were not located from difference maps or included in the refinement. Besides, some water molecule is severely disordered and the related hydrogen atoms were not included. For all the clusters, the highly disordered solvent molecules in the crystal structures were removed with the SQUEEZE program in PLATON. All absorption corrections were performed using the multiscan program. The obtained crystallographic data for these cluster are summarized in Table S1 to Table S2.

## Reference:

1. Sheldrick, G. M. SADABS: Program for Area Detector Adsorption Correction; University of Göttingen: Göttingen, Germany, 1996.
2. Sheldrick, G. M. SHELXL-2014/7: A Program for Structure Refinement; University of Göttingen: Göttingen, Germany, 2014.
3. Dolomanov, O. V.; Bourhis, L. J.; Gildea, R. J. J.; Howard, A. K.; Puschmann, H. OLEX<sup>2</sup>: a complete structure solution, refinement and analysis program. J. Appl. Crystallogr. 2009, 42, 339–341.

**Preparation of active samples for gas adsorption** Crystals were soaked in ethanol and heated at 80 °C for three days. During this time, the ethanol solution should be exchanged several times a day. Subsequently, the sample was degassed under a dynamic vacuum at 100 °C for 6 h to activate the sample. The gas adsorption isotherms of active samples were obtained on a Micromeritics ASAP 2020 volumetric adsorption instrument.

**Photoelectrochemical measurements** were performed on a CHI 660e electrochemical workstation in a standard three-electrode electrochemical cell with a working electrode,

a platinum plate as the counter electrode, and a saturated calomel electrode as the reference electrode. These three electrodes were immersed in the 0.2M Na<sub>2</sub>SO<sub>4</sub> aqueous solution (pH = 6.6). A 300 W high-pressure xenon lamp with UV cut-off filter was used as a full-wavelength light source, located 20 cm away from the working electrode. The colloidal dispersion was obtained by ultrasonic treatment of 5 mg ground crystal sample in 1 ml ethanol for 30 min, and then the dispersion was dropped onto FTO glass (0.75 cm<sup>2</sup> area). After evaporation under an ambient atmosphere for 2 h, the coating film was obtained and used as the working electrode. Mott-Schottky plots were recorded at frequencies of 600, 800, and 1000 Hz, respectively.

**Contact Angle Measurements.** Contact angles were measured on powder samples using a contact angle meter with a rotatable substrate holder. To perform contact angle measurements, 20 mg of powder samples of the clusters were deposited on a glass substrate bed. Then, powders were pressed to make a flat surface by the glass slide. A 10  $\mu$ L water droplet was released slowly on the flat surface of the powder samples. The droplet image was taken by a high-performance charge-coupled device (CCD) sensor. The contact angle of all powder samples was analyzed by five-point simulation analysis.

**Photocatalytic experiments.** The photocatalytic experiments were performed in a 100 mL optical reaction vessel with stirring at ambient temperature. A mixture of 3 mg photocatalyst, 10 mg [Ru(bpy)<sub>3</sub>]Cl<sub>2</sub>·6H<sub>2</sub>O and 5 mL triethanolamine (TEOA) was put into optical reaction vessel, followed by the addition of 8 mL acetonitrile and 2 mL deionized water. After homogeneous mixing, the suspension was stirred and purged with carbon dioxide for 10 min to remove air. A 300 W Xe lamp equipped with a UV cut-off filter ( $\lambda \geq 420$  nm) was utilized as the light source. For each evaluation of gaseous products, 400  $\mu$ L of the headspace was injected into the gas chromatography (Shimadzu GC2014, argon as a carrier gas) every hour.

**In situ diffuse reflectance infrared Fourier transform spectroscopy (DRIFTS) measurements.** In situ DRIFTS over **Ti<sub>16</sub>L<sub>4</sub>\_1** was obtained by using a Bruker INVENIO S FT-IR spectrophotometer, equipped with an MCT detector cooled by liquid nitrogen and a commercial reaction chamber from Harrick Scientific. The sample

was degassed at 373 K in N<sub>2</sub> atmosphere for 30 min, and then the gas flow was switched to pure CO<sub>2</sub> through deionized water for adsorption at room temperature. The sample was irradiated by the Xe lamp through a quartz window. The gaseous mixture of CO<sub>2</sub> and H<sub>2</sub>O vapor were steadily produced before the measurement. The background spectrum was collected after 10 min of adsorption in pure CO<sub>2</sub>. After then, the IR spectra were collected in situ through the MCT detector. Each spectrum was recorded by averaging 64 scans at a 4 cm<sup>-1</sup> spectral resolution.

## 2. Detailed Structure Information for Ti<sub>16</sub>L<sub>4</sub> Compounds.

**Table S1:** Crystallographic data of the three Ti<sub>16</sub>L<sub>4</sub> compounds.

| Compounds                                                                   | Ti <sub>16</sub> L <sub>4</sub> _1                                                 | Ti <sub>16</sub> L <sub>4</sub> _2                                                                | Ti <sub>16</sub> L <sub>4</sub> _3                                                                 |
|-----------------------------------------------------------------------------|------------------------------------------------------------------------------------|---------------------------------------------------------------------------------------------------|----------------------------------------------------------------------------------------------------|
| CCDC                                                                        | 2174429                                                                            | 2174430                                                                                           | 2174431                                                                                            |
| Cryst. syst.                                                                | monoclinic                                                                         | monoclinic                                                                                        | tetragonal                                                                                         |
| Space group                                                                 | C2/c                                                                               | C2/c                                                                                              | I422                                                                                               |
| Formula                                                                     | C <sub>423</sub> H <sub>529</sub> N <sub>14</sub> O <sub>73</sub> Ti <sub>16</sub> | C <sub>396</sub> H <sub>484</sub> Cl <sub>2</sub> N <sub>4</sub> O <sub>68</sub> Ti <sub>16</sub> | C <sub>432</sub> H <sub>536</sub> Cl <sub>4</sub> N <sub>24</sub> O <sub>64</sub> Ti <sub>16</sub> |
| Fw                                                                          | 7743.97                                                                            | 7225.14                                                                                           | 7997.02                                                                                            |
| <i>a</i> [Å]                                                                | 39.1900(19)                                                                        | 53.303(2)                                                                                         | 38.021(13)                                                                                         |
| <i>b</i> [Å]                                                                | 32.5046(16)                                                                        | 19.9467(8)                                                                                        | 38.021(13)                                                                                         |
| <i>c</i> [Å]                                                                | 38.1646(18)                                                                        | 50.645(2)                                                                                         | 19.702(4)                                                                                          |
| $\beta$ [°]                                                                 | 115.461(2)                                                                         | 121.288(2)                                                                                        | 90                                                                                                 |
| <i>V</i> [Å <sup>3</sup> ]                                                  | 43894(4)                                                                           | 46016(3)                                                                                          | 28481(20)                                                                                          |
| <i>Z</i>                                                                    | 4                                                                                  | 4                                                                                                 | 2                                                                                                  |
| $\rho_{\text{calc}}/\text{cm}^3$                                            | 1.079                                                                              | 1.067                                                                                             | 0.933                                                                                              |
| $\mu/\text{mm}^{-1}$                                                        | 1.921                                                                              | 1.818                                                                                             | 1.618                                                                                              |
| <i>F</i> (000)                                                              | 15216.0                                                                            | 15623.0                                                                                           | 8456.0                                                                                             |
| Data/restraints/parameters                                                  | 38766/325/2344                                                                     | 40607/275/2453                                                                                    | 10299/535/648                                                                                      |
| Goof                                                                        | 1.105                                                                              | 1.031                                                                                             | 1.009                                                                                              |
| <i>R</i> <sub>1</sub> / <i>wR</i> <sub>2</sub> ( <i>I</i> > 2σ( <i>I</i> )) | 0.0997/0.2961                                                                      | 0.0950/0.2783                                                                                     | 0.0622/0.1693                                                                                      |
| <i>R</i> <sub>1</sub> / <i>wR</i> <sub>2</sub> (all data)                   | 0.1166/0.3132                                                                      | 0.1070/0.2930                                                                                     | 0.0888/0.1865                                                                                      |

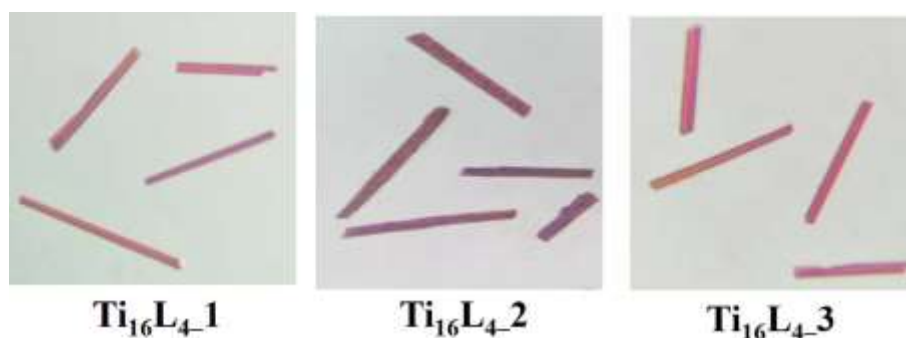

**Figure S1.** Pictures of fresh crystals of three Ti<sub>16</sub>L<sub>4</sub> clusters separated from the solution.

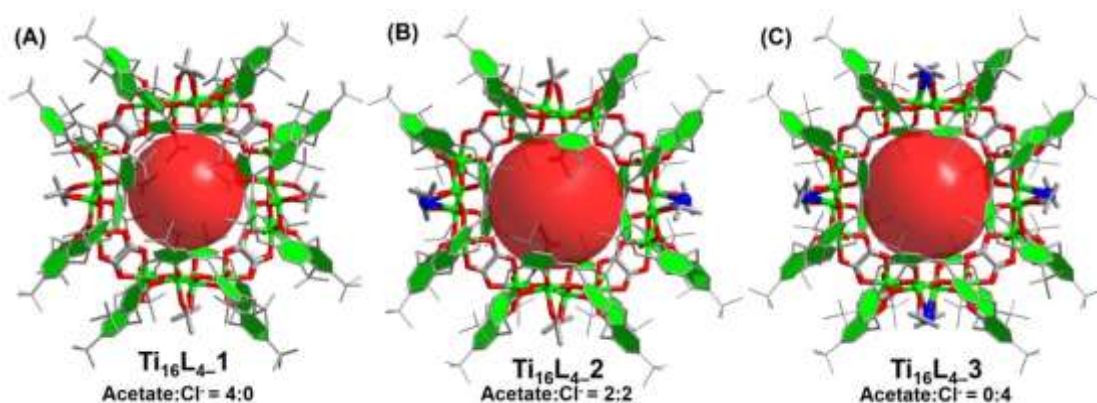

**Figure S2.** Crystal structures of the three  $\text{Ti}_{16}\text{L}_4$  clusters.

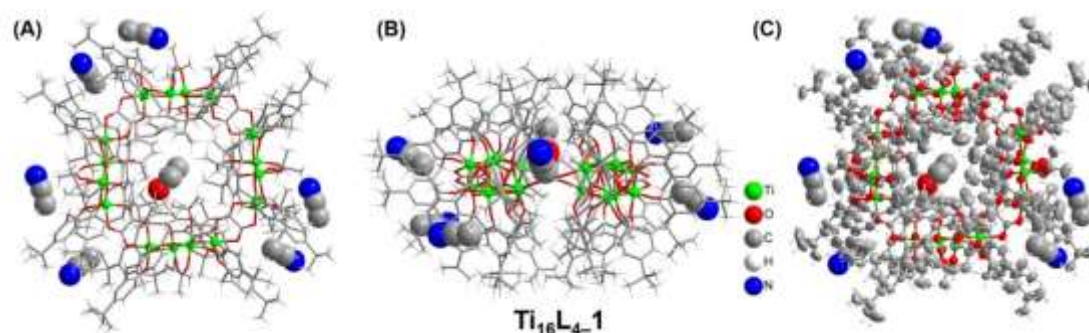

**Figure S3.** The molecular structure of  $\text{Ti}_{16}\text{L}_4\text{-1}$ . (a) and (a) The ball-and-stick view; (b) the ORTEP-style view.

$\text{Ti}_{16}\text{L}_4\text{-1}$  is isolated from the acetonitrile. The molecular formula of  $\text{Ti}_{16}\text{L}_4\text{-1}$  was determined as  $[\text{H}_4\text{Ti}_{16}\text{O}_8(\text{TBC}[8])_4(\text{C}_2\text{O}_4)_4(\text{Ac})_4(\text{O}^i\text{Pr})_8]\cdot^i\text{PrOH}\cdot 13\text{CH}_3\text{CN}$ . Some highly disordered solvent molecules in the crystal structures were removed with the SQUEEZE program in PLATON, and its possible formula was proposed based on the SQUEEZE and TGA results. SCXRD analysis showed the position of some guest molecules. An  $^i\text{PrOH}$  guest is located inside the macrocycle. Outside the macrocycle, there are  $\text{CH}_3\text{CN}$  molecules located at the cup mouth of  $\text{TBC}[8]$ . Interestingly, in  $\text{Ti}_{16}\text{L}_4$ , two  $\text{TBC}[8]$  are adjacent to each other to form a smaller pocket in which a  $\text{CH}_3\text{CN}$  molecule is anchored through hydrogen bond interactions. The average  $\text{C-H}\cdots\text{N}$  lengths is 2.994 Å.

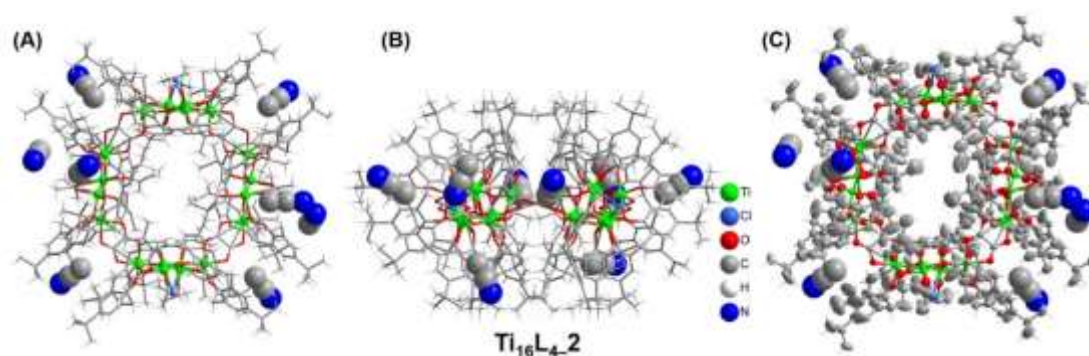

**Figure S4.** The molecular structure of  $\text{Ti}_{16}\text{L}_4\text{-2}$ . (a) and (a) The ball-and-stick view; (b) the ORTEP-style view.

The molecular formula of  $\text{Ti}_{16}\text{L}_4\text{-2}$  was determined as  $[\text{H}_4\text{Ti}_{16}\text{O}_8(\text{TBC}[8])_4(\text{C}_2\text{O}_4)_4(\text{Ac})_2\text{Cl}_2(\text{O}^i\text{Pr})_8]\cdot 56\text{CH}_3\text{CN}$ . Some highly disordered solvent molecules in the crystal structures were removed with the SQUEEZE program in PLATON, and its possible formula was proposed based on the SQUEEZE and TGA results. SCXRD analysis showed the position of some guest molecules for  $\text{Ti}_{16}\text{L}_4\text{-2}$ . Unlike  $\text{Ti}_{16}\text{L}_4\text{-1}$ , no  $^i\text{PrOH}$  molecules were found inside the ring. Outside the macrocycle, there are acetonitrile molecules located at the cup mouth of the  $\{\text{Ti}_4\text{O}_2(\text{TBC}[8])(\text{Ac})(\text{O}^i\text{Pr})_2\}$  units. No  $\text{CH}_3\text{CN}$  was found at the cup mouth of the  $\{\text{Ti}_4\text{O}_2(\text{TBC}[8])(\text{Cl})(\text{O}^i\text{Pr})_2\}$  units. This may be due to the high electronegativity of  $\text{Cl}^-$  ions, which

is not conducive to the proximity of acetonitrile molecule. In addition, like **Ti<sub>16</sub>L<sub>4</sub>-1**, CH<sub>3</sub>CN guest is also present in the small pockets formed by the two adjacent TBC[8].

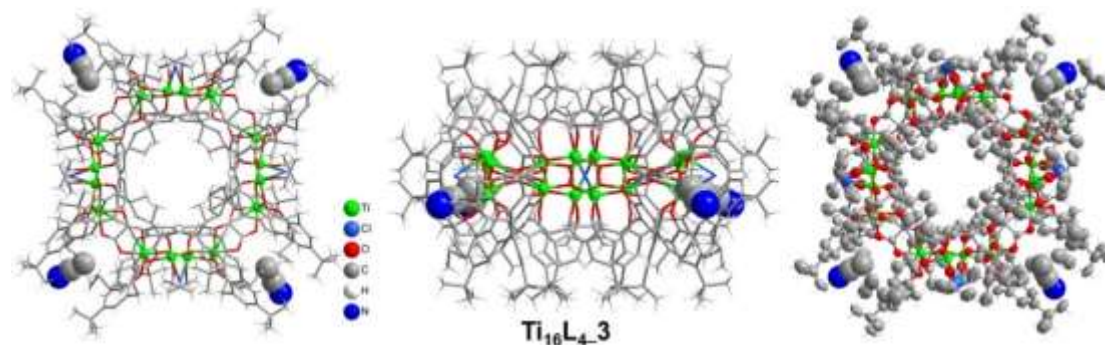

**Figure S5.** The molecular structure of **Ti<sub>16</sub>L<sub>4</sub>-3**. (a) and (a) The ball-and-stick view; (b) the ORTEP-style view.

The molecular formula of **Ti<sub>16</sub>L<sub>4</sub>-3** was determined as [H<sub>4</sub>Ti<sub>16</sub>O<sub>8</sub>(TBC[8])<sub>4</sub>(C<sub>2</sub>O<sub>4</sub>)<sub>4</sub>Cl<sub>4</sub>(O<sup>i</sup>Pr)<sub>8</sub>]-40CH<sub>3</sub>CN. Some highly disordered solvent molecules in the crystal structures were removed with the SQUEEZE program in PLATON, and its possible formula was proposed based on the SQUEEZE and TGA results. SCXRD analysis showed the position of some guest molecules for **Ti<sub>16</sub>L<sub>4</sub>-3**. Outside the macrocycle, CH<sub>3</sub>CN guest is present in the small pockets formed by the two adjacent TBC[8], but no guest molecules were found at the cup mouth of the four {Ti<sub>4</sub>O<sub>2</sub>(TBC[8])(Cl)(O<sup>i</sup>Pr)<sub>2</sub>} units. This is consistent with the situation in **Ti<sub>16</sub>L<sub>4</sub>-3**.

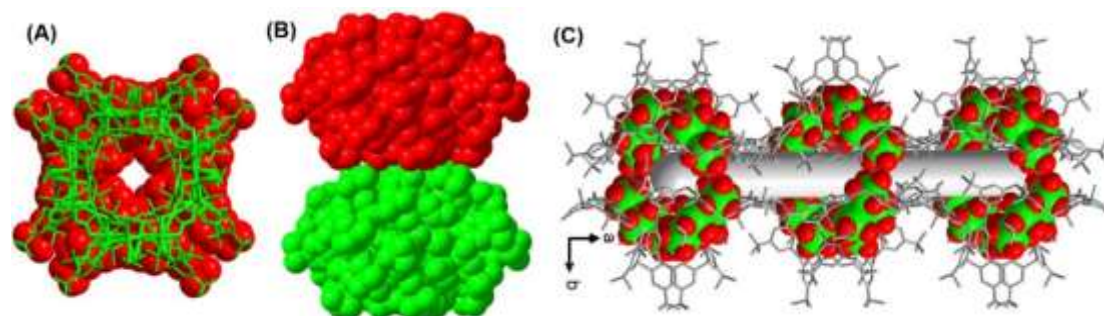

**Figure S6.** The as-formed nanotube in **Ti<sub>16</sub>L<sub>4</sub>**.

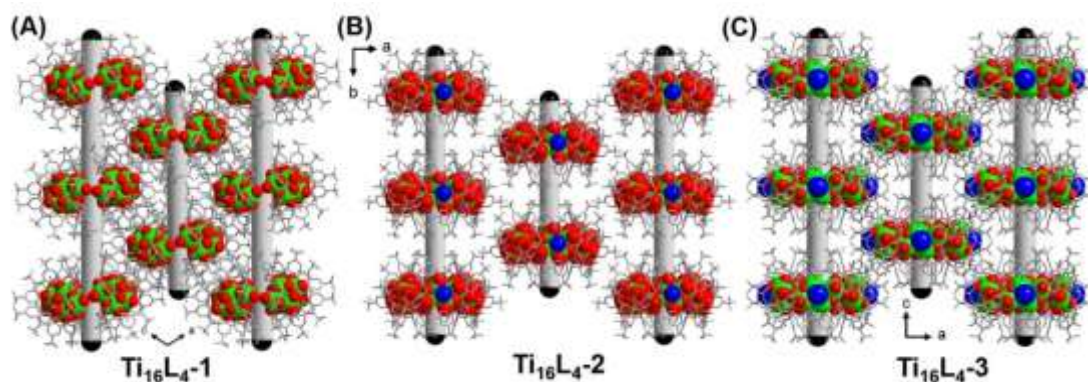

**Figure S7.** The adjacent nanotubes in **Ti<sub>16</sub>L<sub>4</sub>** are interlaced with each other to avoid the spatial repulsion between the tert-butyl of the adjacent ring.

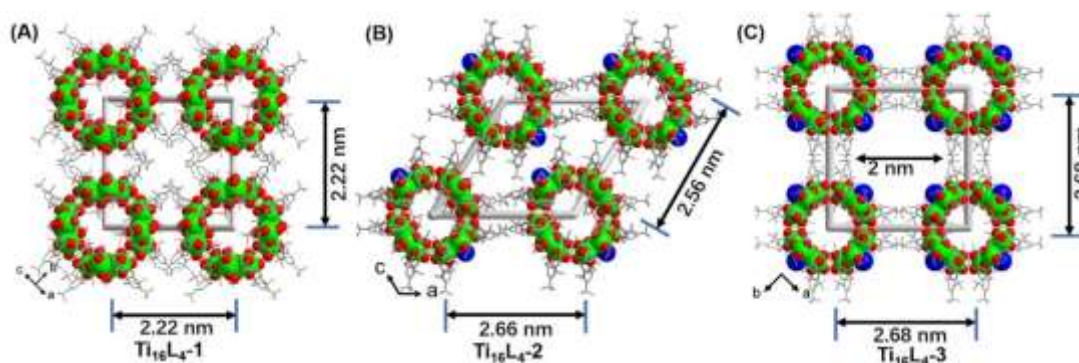

**Figure S8.** Three patterns of nanotubes arrangement in square array or hexagonal array.

**Table S2:** Crystallographic data of derived clusters of  $\text{Ti}_{16}\text{L}_4$  obtained through Path I.

| Conditions                                    | Soaking the $\text{Ti}_{16}\text{L}_4\text{-1}$ in 1M formic acid solution for 24h | Soaking the $\text{Ti}_{16}\text{L}_4\text{-1}$ in 5M formic acid solution for 24 h | Soaking the $\text{Ti}_{16}\text{L}_4\text{-2}$ in 5M trifluoroacetic acid solution for 24h | Soaking the $\text{Ti}_{16}\text{L}_4\text{-1}$ in 5M chloroacetic acid solution for 24h | Soaking the $\text{Ti}_{16}\text{L}_4\text{-1}$ in 5M bromoacetic acid solution for 24h |
|-----------------------------------------------|------------------------------------------------------------------------------------|-------------------------------------------------------------------------------------|---------------------------------------------------------------------------------------------|------------------------------------------------------------------------------------------|-----------------------------------------------------------------------------------------|
| Compounds                                     | $\text{Ti}_{16}\text{L}_4\text{-1(a)}$                                             | $\text{Ti}_{16}\text{L}_4\text{-1/HFa(a)}$                                          | $\text{Ti}_{16}\text{L}_4\text{-2/HTfa}$                                                    | $\text{Ti}_{16}\text{L}_4\text{-1/HCl a}$                                                | $\text{Ti}_{16}\text{L}_4\text{-1/HBra}$                                                |
| CCDC                                          | 2174432                                                                            | 2180762                                                                             | 2287667                                                                                     | 2287668                                                                                  | 2240657                                                                                 |
| Cryst. syst.                                  | monoclinic                                                                         | monoclinic                                                                          | monoclinic                                                                                  | monoclinic                                                                               | monoclinic                                                                              |
| Space group                                   | C2/c                                                                               | C2/c                                                                                | C2/c                                                                                        | C2/c                                                                                     | C2/c                                                                                    |
| Formula                                       | $\text{C}_{380}\text{H}_{496}\text{O}_{95}\text{Ti}_{16}$                          | $\text{C}_{382}\text{H}_{479}\text{N}_3\text{O}_{80}\text{Ti}_{16}$                 | $\text{C}_{382}\text{H}_{450}\text{F}_{12}\text{N}_4\text{O}_{72}\text{Ti}_{16}$            | $\text{C}_{380}\text{H}_{552}\text{Cl}_4\text{O}_{11}$                                   | $\text{C}_{378}\text{H}_{448}\text{Br}_4\text{O}_{74}\text{Ti}_{16}$                    |
| $F_w$                                         | 7350.14                                                                            | 7159.05                                                                             | 7243.83                                                                                     | 7980.38                                                                                  | 7261.38                                                                                 |
| $a[\text{\AA}]$                               | 38.100(2)                                                                          | 37.993(4)                                                                           | 54.372(7)                                                                                   | 39.051(3)                                                                                | 39.278(7)                                                                               |
| $b[\text{\AA}]$                               | 33.157(2)                                                                          | 33.265(4)                                                                           | 20.162(2)                                                                                   | 32.810(3)                                                                                | 32.838(6)                                                                               |
| $c[\text{\AA}]$                               | 37.2491(19)                                                                        | 37.218(4)                                                                           | 50.494(7)                                                                                   | 37.614(3)                                                                                | 37.800(6)                                                                               |
| $\beta[^\circ]$                               | 113.291(2)                                                                         | 113.350(5)                                                                          | 121.984(4)                                                                                  | 115.050(3)                                                                               | 115.147(5)                                                                              |
| $V[\text{\AA}^3]$                             | 43222(4)                                                                           | 43184(9)                                                                            | 46950(10)                                                                                   | 43661(6)                                                                                 | 44135(13)                                                                               |
| Z                                             | 4                                                                                  | 4                                                                                   | 4                                                                                           | 4                                                                                        | 4                                                                                       |
| $\rho_{\text{calc}}/\text{g cm}^{-3}$         | 1.130                                                                              | 1.101                                                                               | 1.025                                                                                       | 1.214                                                                                    | 1.093                                                                                   |
| $\mu/\text{mm}^{-1}$                          | 1.981                                                                              | 1.960                                                                               | 1.823                                                                                       | 2.162                                                                                    | 2.186                                                                                   |
| $F(000)$                                      | 15552.0                                                                            | 15136.0                                                                             | 15224.0                                                                                     | 16912.0                                                                                  | 15200.0                                                                                 |
| $2\theta$ range for data collection/ $^\circ$ | 4.394 to 102.69                                                                    | 4.752 to 110                                                                        | 4.886 to 90.208                                                                             | 4.718 to 84.988                                                                          | 3.186 to 96.354                                                                         |
| Data/restraints/parameters                    | 35504/446/2338                                                                     | 40988/559/2396                                                                      | 28404/2173/2<br>516                                                                         | 23005/917/24<br>81                                                                       | 42512/1936/2318                                                                         |
| GooF                                          | 1.061                                                                              | 1.056                                                                               | 1.118                                                                                       | 1.118                                                                                    | 1.206                                                                                   |
| $R1/wR2(I > 2\sigma(I))$                      | 0.0750/0.2233                                                                      | 0.0920/0.2646                                                                       | 0.0902/0.2705                                                                               | 0.1329/0.3450                                                                            | 0.1387/0.3608                                                                           |
| $R1/wR2(\text{all data})$                     | 0.1040/0.2420                                                                      | 0.1283/0.2941                                                                       | 0.1304/0.3036                                                                               | 0.1794/0.3742                                                                            | 0.1732/0.3810                                                                           |

**Table S3:** Crystallographic data of derived clusters of  $\text{Ti}_{16}\text{L}_4$  obtained through Path II.

| Conditions | Soaking the $\text{Ti}_{16}\text{L}_4\text{-1}$ in 5M NaOH solution for 30 min | Soaking the $\text{Ti}_{16}\text{L}_4\text{-1/NaOH}$ in formic acid solution for 30 min | Soaking the $\text{Ti}_{16}\text{L}_4\text{-1/NaOH}$ in 1M acetic acid solution for 30 min | Soaking the $\text{Ti}_{16}\text{L}_4\text{-1/NaOH}$ in 1M aminoacetic acid | Soaking the $\text{Ti}_{16}\text{L}_4\text{-1/NaOH}$ in 1M oxalic acid solution for 30 min | Soaking the $\text{Ti}_{16}\text{L}_4\text{-1/NaOH}$ in 1M glycolic acid for 30 min | Soaking the $\text{Ti}_{16}\text{L}_4\text{-1/NaOH}$ in 1M phosphoric acid |
|------------|--------------------------------------------------------------------------------|-----------------------------------------------------------------------------------------|--------------------------------------------------------------------------------------------|-----------------------------------------------------------------------------|--------------------------------------------------------------------------------------------|-------------------------------------------------------------------------------------|----------------------------------------------------------------------------|
|------------|--------------------------------------------------------------------------------|-----------------------------------------------------------------------------------------|--------------------------------------------------------------------------------------------|-----------------------------------------------------------------------------|--------------------------------------------------------------------------------------------|-------------------------------------------------------------------------------------|----------------------------------------------------------------------------|

| Compounds                          | solution for 30 min                                                                                  |                                                                                        |                                                                                        |                                                                                        |                                                                    |                                                                                        | solution for 30 min                                                |
|------------------------------------|------------------------------------------------------------------------------------------------------|----------------------------------------------------------------------------------------|----------------------------------------------------------------------------------------|----------------------------------------------------------------------------------------|--------------------------------------------------------------------|----------------------------------------------------------------------------------------|--------------------------------------------------------------------|
|                                    | <b>Ti<sub>16</sub>L<sub>4</sub>-1/NaOH</b>                                                           | <b>Ti<sub>16</sub>L<sub>4</sub>-1/HF<sub>a</sub>(b)</b>                                | <b>Ti<sub>16</sub>L<sub>4</sub>-1/HAc</b>                                              | <b>Ti<sub>16</sub>L<sub>4</sub>-1/HAm<sub>a</sub></b>                                  | <b>Ti<sub>16</sub>L<sub>4</sub>-1/HO<sub>a</sub></b>               | <b>Ti<sub>16</sub>L<sub>4</sub>-1/HG<sub>a</sub></b>                                   | <b>Ti<sub>16</sub>L<sub>4</sub>-1/H<sub>3</sub>PO<sub>4</sub></b>  |
| CCDC                               | 2174433                                                                                              | 2174435                                                                                | 2174434                                                                                | 2240528                                                                                | 2174438                                                            | 2174437                                                                                | 2240658                                                            |
| Cryst. syst.                       | monoclinic                                                                                           | monoclinic                                                                             | monoclinic                                                                             | monoclinic                                                                             | monoclinic                                                         | monoclinic                                                                             | monoclinic                                                         |
| Space group                        | C2/c                                                                                                 | C2/c                                                                                   | C2/c                                                                                   | C2/c                                                                                   | C2/c                                                               | C2/c                                                                                   | C2/c                                                               |
| Formula                            | C <sub>366</sub> H <sub>451</sub> N <sub>3</sub> Na <sub>8</sub> O <sub>8</sub><br>5Ti <sub>16</sub> | C <sub>364</sub> H <sub>488</sub> Na <sub>4</sub> O <sub>114</sub><br>Ti <sub>16</sub> | C <sub>396</sub> H <sub>568</sub> Na <sub>2</sub> O <sub>141</sub><br>Ti <sub>16</sub> | C <sub>384</sub> H <sub>456</sub> Na <sub>4</sub> O <sub>84</sub> T<br>i <sub>16</sub> | C <sub>368</sub> H <sub>420</sub> O <sub>76</sub> Ti <sub>16</sub> | C <sub>372</sub> H <sub>442</sub> N <sub>2</sub> O <sub>84</sub> Ti <sub>11</sub><br>6 | C <sub>360</sub> H <sub>424</sub> O <sub>71</sub> Ti <sub>16</sub> |
| F <sub>w</sub>                     | 7202.24                                                                                              | 7545.87                                                                                | 8396.85                                                                                | 7273.82                                                                                | 6825.42                                                            | 7051.65                                                                                | 6873.37                                                            |
| a[Å]                               | 38.447(2)                                                                                            | 37.982(7)                                                                              | 39.095(9)                                                                              | 39.187(3)                                                                              | 39.32(4)                                                           | 38.8238(16)                                                                            | 38.634(3)                                                          |
| b[Å]                               | 32.9077(17)                                                                                          | 33.195(6)                                                                              | 33.277(15)                                                                             | 33.088(2)                                                                              | 32.41(4)                                                           | 32.5568(14)                                                                            | 32.619(3)                                                          |
| c[Å]                               | 37.172(2)                                                                                            | 36.904(7)                                                                              | 37.714(16)                                                                             | 37.420(3)                                                                              | 37.78(3)                                                           | 37.8922(16)                                                                            | 37.291(3)                                                          |
| β[°]                               | 114.933(2)                                                                                           | 113.349(6)                                                                             | 114.899(9)                                                                             | 115.189(3)                                                                             | 115.25(3)                                                          | 115.418(2)                                                                             | 114.837(2)                                                         |
| V[Å <sup>3</sup> ]                 | 42646(4)                                                                                             | 42718(14)                                                                              | 44508(30)                                                                              | 43905(6)                                                                               | 43259(3)                                                           | 43536(74)                                                                              | 42646(6)                                                           |
| Z                                  | 4                                                                                                    | 4                                                                                      | 4                                                                                      | 4                                                                                      | 4                                                                  | 4                                                                                      | Z                                                                  |
| ρ <sub>calc</sub> /cm <sup>3</sup> | 1.121                                                                                                | 1.173                                                                                  | 1.253                                                                                  | 1.103                                                                                  | 1.228                                                              | 1.061                                                                                  | 1.047                                                              |
| μ/mm <sup>-1</sup>                 | 1.943                                                                                                | 2.056                                                                                  | 1.934                                                                                  | 1.964                                                                                  | 1.954                                                              | 1.193                                                                                  | 1.865                                                              |
| F(000)                             | 15136.0                                                                                              | 15944.0                                                                                | 11784.0                                                                                | 15336.0                                                                                | 17056.0                                                            | 14528.0                                                                                | 14170.0                                                            |
| 2θ range for data collection/°     | 4.758 to 104.634                                                                                     | 4.784 to 96.476                                                                        | 4.694 to 96.42                                                                         | 6.098 to 104.68                                                                        | 4.718 to 84.636                                                    | 4.702 to 103.078                                                                       | 4.758 to 94.958                                                    |
| Data/restraints/parameters         | 36171/151/2310                                                                                       | 30448/606/2223                                                                         | 31835/407/2397                                                                         | 37451/388/2445                                                                         | 22518/536/2115                                                     | 35703/375/2225                                                                         | 28360/369/2094                                                     |
| Goof                               | 1.154                                                                                                | 1.046                                                                                  | 1.064                                                                                  | 1.205                                                                                  | 1.079                                                              | 1.096                                                                                  | 0.992                                                              |
| R1/wR2(I>2σ(I))                    | 0.1112/0.3308                                                                                        | 0.0929/0.2702                                                                          | 0.0924/0.2705                                                                          | 0.1148/0.3256                                                                          | 0.1595/0.3789                                                      | 0.0810/0.2623                                                                          | 0.1242/0.3362                                                      |
| R1/wR2(all data)                   | 0.1265/0.3440                                                                                        | 0.1313/0.3040                                                                          | 0.1306/0.3031                                                                          | 0.1470/0.3510                                                                          | 0.2193/0.4372                                                      | 0.0929/0.2729                                                                          | 0.1727/0.3708                                                      |

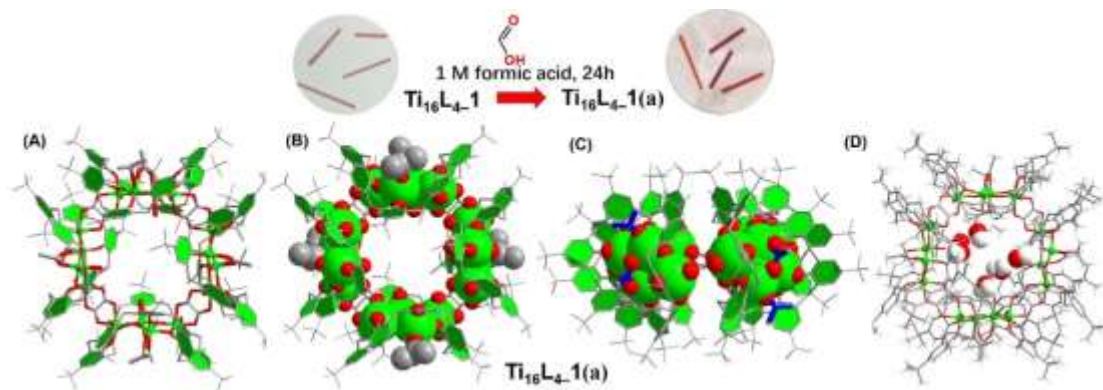

**Figure S9.** (A-C) Crystal structures of the **Ti<sub>16</sub>L<sub>4</sub>-1(a)**, emphasizing its nano-sized dimensions (top and side views). SCXRD analysis showed that the four internal <sup>i</sup>PrO<sup>-</sup> sites were replaced by H<sub>2</sub>O molecules, but the four acetic acid sites and four internal <sup>i</sup>PrO<sup>-</sup> sites remained unchanged. (D) SCXRD analysis showed the position of some guest molecules for **Ti<sub>16</sub>L<sub>4</sub>-1(a)**. Because the crystal is immersed in water solution for a long time, the H<sub>2</sub>O molecular occupies the inner space of the macrocycle.

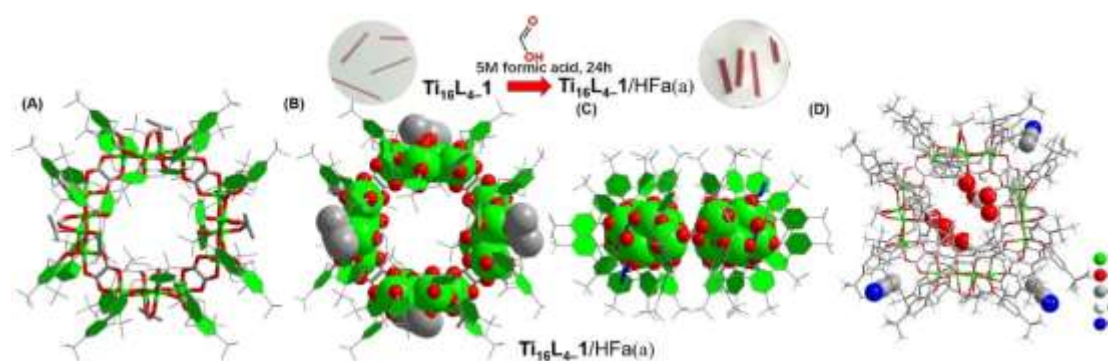

**Figure S10.** (A-C) Crystal structures of the **Ti<sub>16</sub>L<sub>4</sub>-1/HFa(a)**, emphasizing its nano-sized dimensions (top and side views). SCXRD analysis showed that four acetate sites were replaced by formate ligands, and four internal <sup>i</sup>PrO<sup>-</sup> sites were replaced by H<sub>2</sub>O molecules, but the four external <sup>i</sup>PrO<sup>-</sup> sites remained unchanged. (D) SCXRD analysis showed the position of some guest molecules for **Ti<sub>16</sub>L<sub>4</sub>-1/HFa(a)**. The inner space of the macrocycle is occupied by H<sub>2</sub>O molecules. No CH<sub>3</sub>CN guest molecules were found at the cup mouth of the four {Ti<sub>4</sub>O<sub>2</sub>(TBC[8])} units. However, in the small pockets formed by the two adjacent {Ti<sub>4</sub>O<sub>2</sub>(TBC[8])} units, the CH<sub>3</sub>CN guest is still existed.

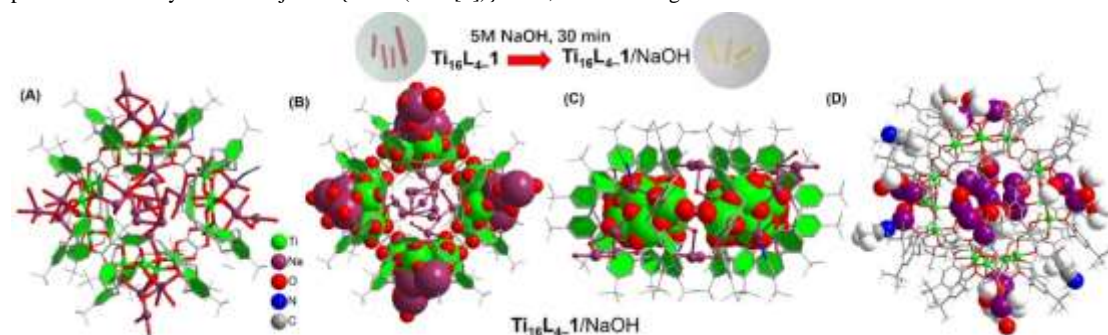

**Figure S11.** (A-C) Crystal structures of the **Ti<sub>16</sub>L<sub>4</sub>-1/NaOH**, emphasizing its nano-sized dimensions (top and side views). The surface acetate and <sup>i</sup>PrO<sup>-</sup> ligands are fully exchanged by the OH<sup>-</sup> ion; (D) SCXRD analysis showed the position of some guest molecules for **Ti<sub>16</sub>L<sub>4</sub>-1/NaOH**. Because the crystal is immersed in NaOH solution, and a large amount of Na<sup>+</sup> ions are embedded in the ring via OH<sup>-</sup> bridging. The Ti:Na ration in **Ti<sub>16</sub>L<sub>4</sub>-1/NaOH** was confirmed to be about 2.07:1 by ICP-AES analysis, which is almost consistent with EDS results. Interestingly, in the small pockets formed by the two adjacent {Ti<sub>4</sub>O<sub>2</sub>(TBC[8])} units, the CH<sub>3</sub>CN guest is still existed. This position can be thought of as a molecular cage, firmly trapping CH<sub>3</sub>CN molecules inside.

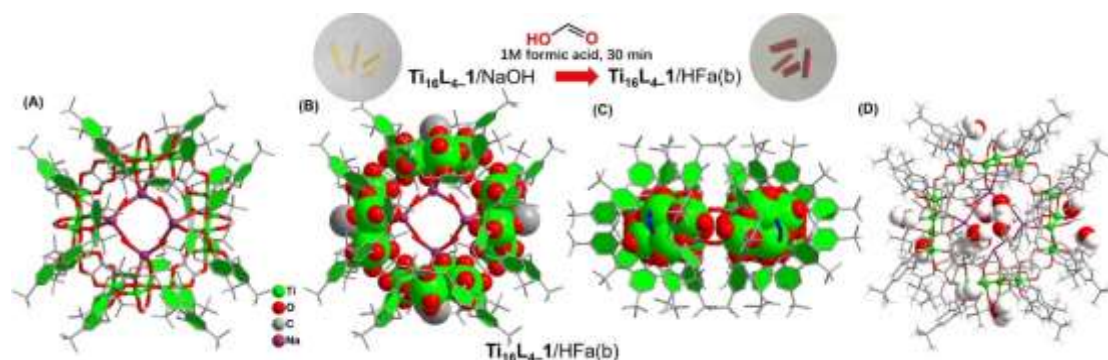

**Figure S12.** (A-C) Crystal structures of the **Ti<sub>16</sub>L<sub>4</sub>-1/HFa(b)**, emphasizing its nano-sized dimensions (top and side views). The four  $\mu_2$ -OH<sup>-</sup> sites were replaced by the formate ligands in the  $\mu_2$ -(O,O') form again. The remaining eight OH<sup>-</sup> sites are still occupied by water molecules. (D) SCXRD analysis showed the position of some guest molecules for **Ti<sub>16</sub>L<sub>4</sub>-1/HFa(a)**. Four Na<sup>+</sup> ions are embedded in the cluster through Fa<sup>-</sup> bridging. The remaining space inside the macrocycle is occupied by H<sub>2</sub>O molecules.

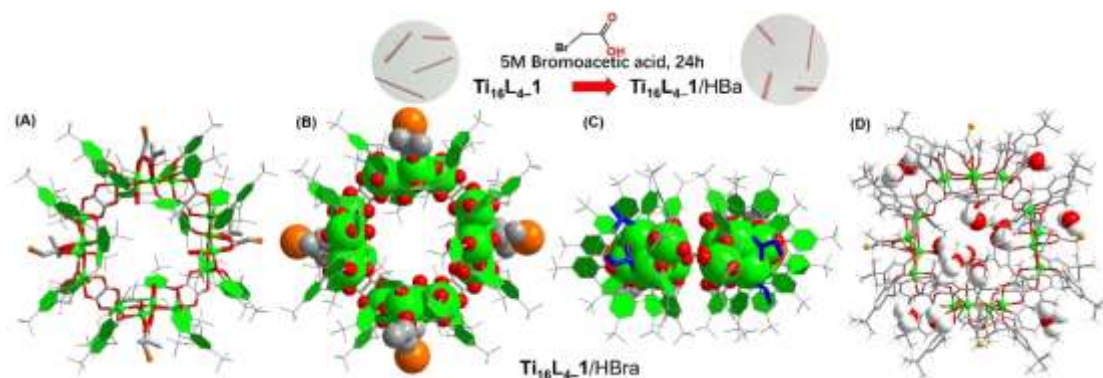

**Figure S13.** (A-C) Crystal structures of the  $\text{Ti}_{16}\text{L}_4\text{-1}/\text{HBra}$ , emphasizing its nano-sized dimensions (top and side views). SCXRD analysis showed that four acetic acid sites were replaced by bromoacetate ligands, and four internal  $^i\text{PrO}^-$  sites were replaced by  $\text{H}_2\text{O}$  molecules, but the four external  $^i\text{PrO}^-$  sites remained unchanged; (D) Because the crystal is immersed in water solution for a long time, the  $\text{H}_2\text{O}$  molecular occupies the inner space of the macrocycle.

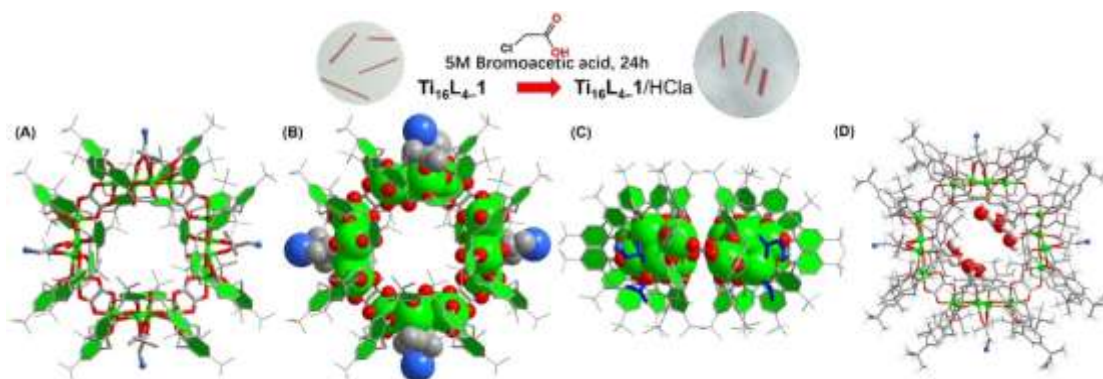

**Figure S14.** (A-C) Crystal structures of the  $\text{Ti}_{16}\text{L}_4\text{-1}/\text{HClA}$ , emphasizing its nano-sized dimensions (top and side views). SCXRD analysis showed that four acetic acid sites were replaced by chloroacetate ligands, and four internal  $^i\text{PrO}^-$  sites were replaced by  $\text{H}_2\text{O}$ , but the four external  $^i\text{PrO}^-$  sites remained unchanged; (D) Because the crystal is immersed in water solution for a long time, the  $\text{H}_2\text{O}$  molecular occupies the inner space of the macrocycle.

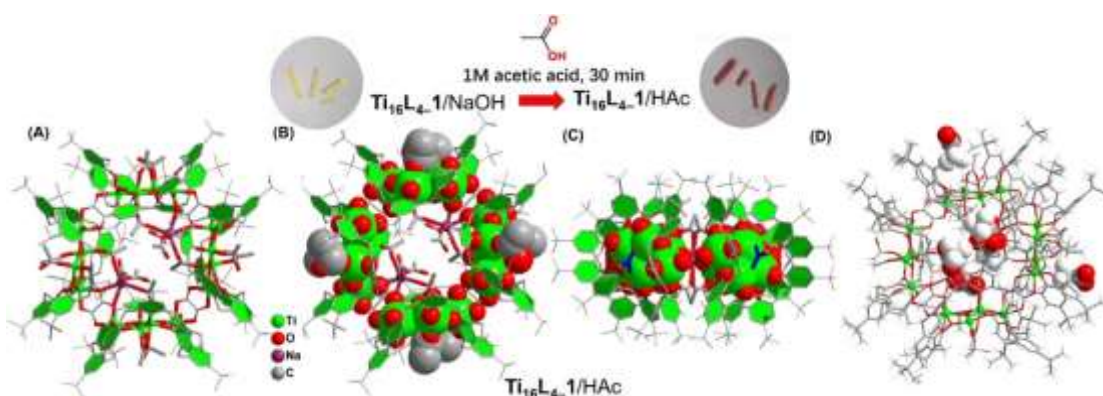

**Figure S15.** (A-C) Crystal structures of the  $\text{Ti}_{16}\text{L}_4\text{-1}/\text{HAc}$ , emphasizing its nano-sized dimensions (top and side views). All twelve  $\text{OH}^-$  sites were replaced by acetate ligands again. (D) SCXRD analysis showed the position of some guest molecules for  $\text{Ti}_{16}\text{L}_4\text{-1}/\text{HAc}$ . Two  $\text{Na}^+$  ions are embedded in the cluster through acetate bridging, and four additional acetic acid molecules are embedded into the ring through coordination with  $\text{Na}^+$  ions. No  $\text{CH}_3\text{CN}$  guest molecules are found outside the ring.

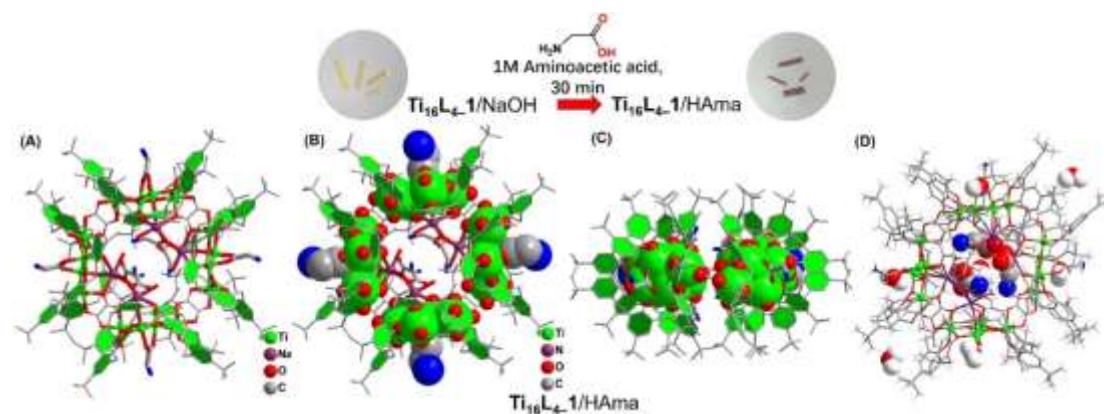

**Figure S16.** (A-C) Crystal structures of the  $\text{Ti}_{16}\text{L}_4\text{-1}/\text{Hama}$ , emphasizing its nano-sized dimensions (top and side views). The four  $\mu_2\text{-OH}^-$  sites were replaced by the aminoacetate ligands in the  $\mu_2\text{-(O,O')}$  form. The remaining eight  $\text{OH}^-$  sites are still occupied by water molecules; (D) SCXRD analysis showed the position of some guest molecules for  $\text{Ti}_{16}\text{L}_4\text{-1}/\text{Hama}$ . Four  $\text{Na}^+$  ions are embedded in the cluster through acetate bridging, and four additional aminoacetic acid molecules are embedded into the ring through coordination with  $\text{Na}^+$  ions. No  $\text{CH}_3\text{CN}$  guest molecules are found outside the ring.

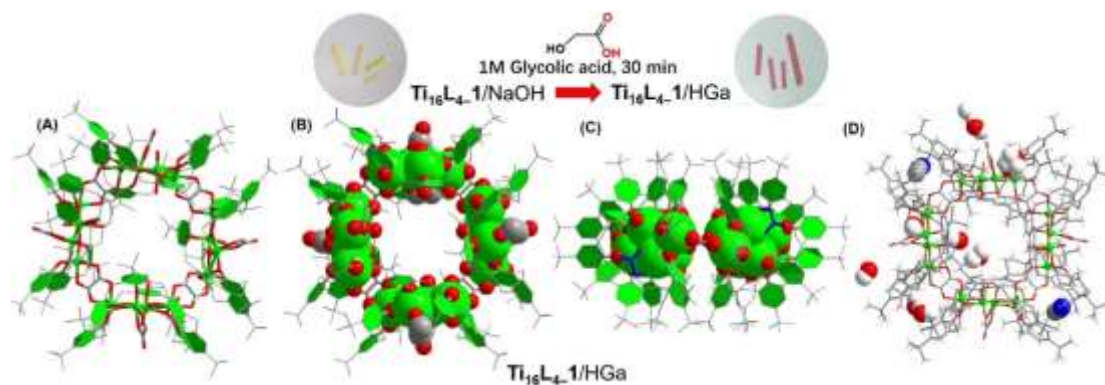

**Figure S17.** (A-C) Crystal structures of the  $\text{Ti}_{16}\text{L}_4\text{-1}/\text{HGa}$ , emphasizing its nano-sized dimensions (top and side views). Four oxalate ligands coordinate with the Ti3 site in chelate-bidentate  $\mu_1\text{-(O,O)}$  mode, while eight  $\text{OH}^-$  ions are coordinated with Ti2 sites. (D) SCXRD analysis showed the position of some guest molecules for  $\text{Ti}_{16}\text{L}_4\text{-1}/\text{HGa}$ . No residual  $\text{Na}^+$  ions were found in the structure. The  $\text{H}_2\text{O}$  molecular occupies the inner space of the macrocycle. In the small pockets formed by the two adjacent  $\{\text{Ti}_4\text{O}_2(\text{TBC}[8])\}$  units, the  $\text{CH}_3\text{CN}$  guest is still existed.

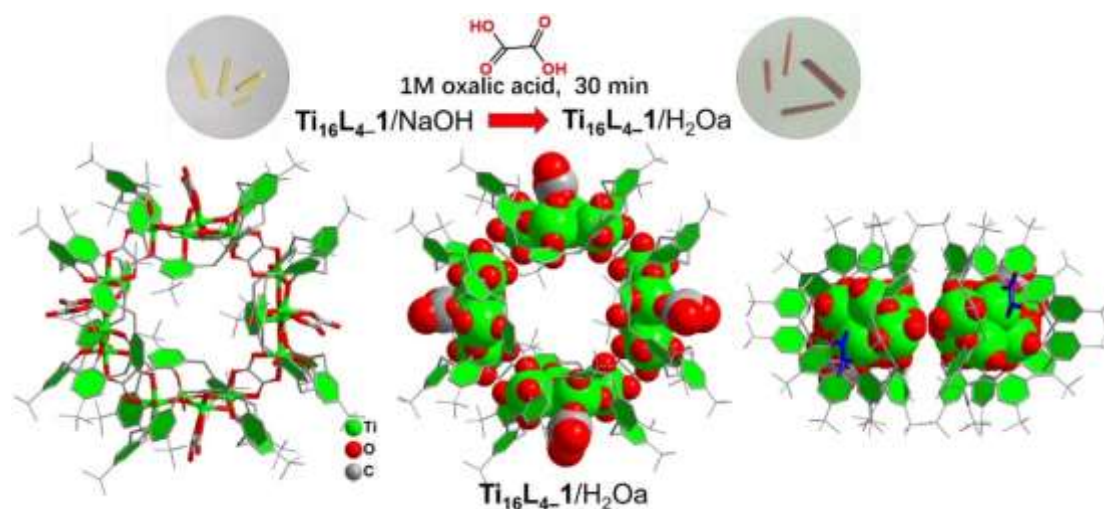

**Figure S18.** Crystal structures of the **Ti<sub>16</sub>L<sub>4</sub>1/H<sub>2</sub>O<sub>a</sub>**, emphasizing its nano-sized dimensions (top and side views). Four glycolate ligands coordinate with the Ti3 site in chelate-bidentate  $\mu_1$ -(O,O) mode, while eight OH<sup>-</sup> ions are coordinated with Ti2 sites. Due to the weak diffraction data of the crystal, we have not been able to determine the position of the guest molecules.

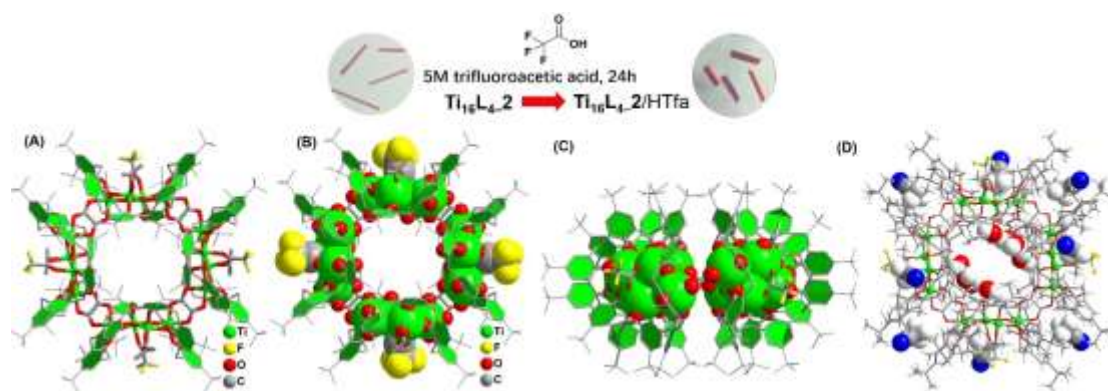

**Figure S19.** (A-C) Crystal structures of the **Ti<sub>16</sub>L<sub>4</sub>2/HTfa**, emphasizing its nano-sized dimensions (top and side views). SCXRD analysis showed that four acetic acid sites were replaced by trifluoroacetate, and four internal <sup>i</sup>PrO<sup>-</sup> sites were replaced by H<sub>2</sub>O, but the four external <sup>i</sup>PrO<sup>-</sup> sites remained unchanged; (D) Because the crystal is immersed in water solution for a long time, the H<sub>2</sub>O molecular occupies the inner space of the macrocycle.

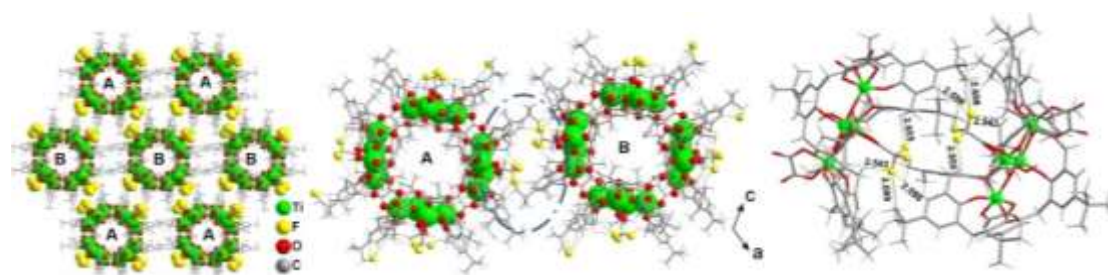

**Figure S20.** The hexagonal array of the nanotube in **Ti<sub>16</sub>L<sub>4</sub>2/HTfa**. Illustration of the H bonds between two interlocked clusters of **Ti<sub>16</sub>L<sub>4</sub>2/HTfa**.

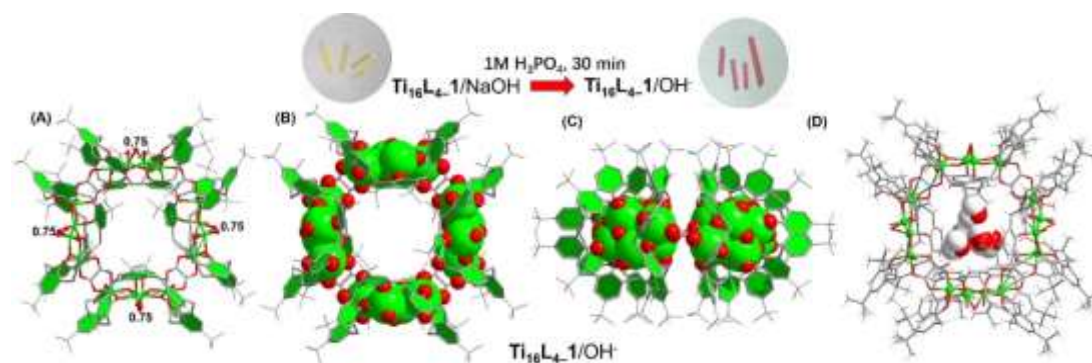

**Figure S21.** (A-C) Crystal structures of the **Ti<sub>16</sub>L<sub>4</sub>1/OH<sup>-</sup>**, emphasizing its nano-sized dimensions (top and side views). SXRD showed that 12 unstable sites were still occupied by OH<sup>-</sup> ions and H<sub>2</sub>O molecules, and all Na<sup>+</sup> ions were detached from the structure; (D) SCXRD analysis showed the position of some guest molecules for **Ti<sub>16</sub>L<sub>4</sub>1/OH<sup>-</sup>**. The H<sub>2</sub>O molecular occupies the inner space of the macrocycle. No CH<sub>3</sub>CN guest molecule was found after two exchanges in the acid-base.

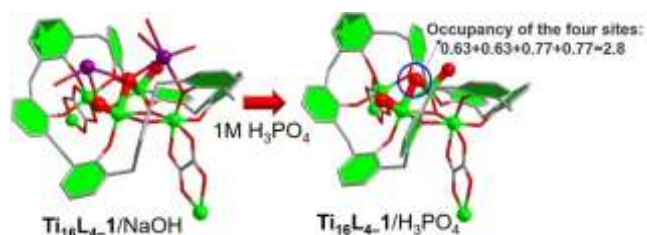

**Figure 22.** The crystals obtained by soaking  $\text{Ti}_{16}\text{L}_4\text{-1}/\text{NaOH}$  in  $\text{H}_3\text{PO}_4$ . Only the  $\{\text{Ti}_4\text{-TBC}[8]\}$  subunit is given here. Notably, structural refinements indicate that the proportion of each  $\mu_2\text{-O}$  site is only 0.75, and these four  $\mu_2$ -bridging fashion sites have a total of three OH ions. This means that after two ligand exchanges, one of the four  $\mu_2$ -bridging sites on the cluster is eventually deleted.

### 3. Powder X-ray diffraction

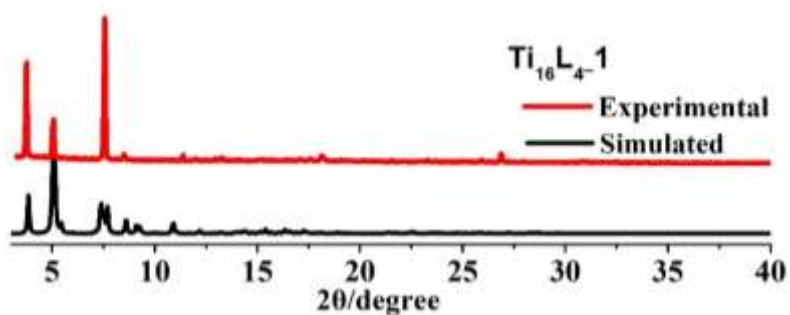

**Figure S23.** The XRD pattern of  $\text{Ti}_{16}\text{L}_4\text{-1}$ .

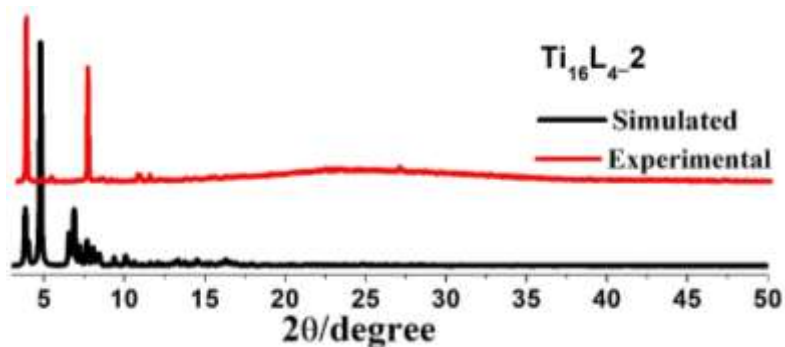

**Figure S24.** The XRD pattern of  $\text{Ti}_{16}\text{L}_4\text{-2}$ .

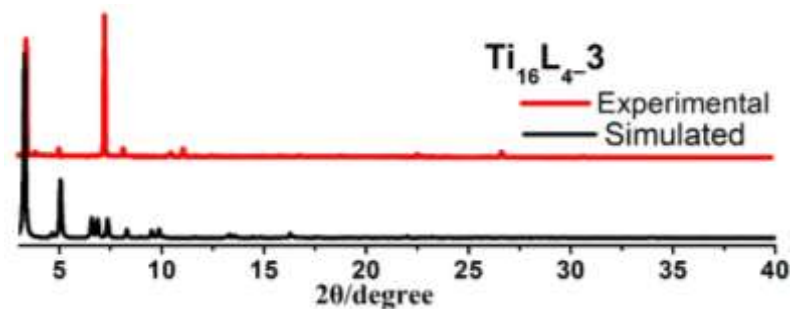

**Figure S25.** The XRD pattern of  $\text{Ti}_{16}\text{L}_4\text{-3}$ .

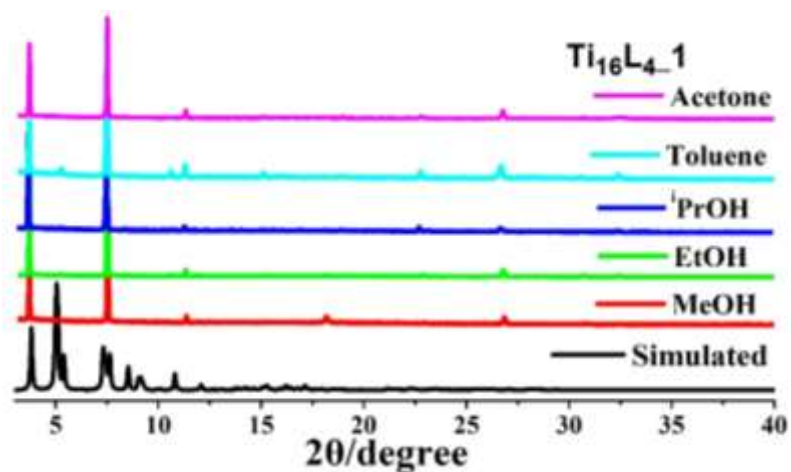

Figure S26. XRD patterns of  $\text{Ti}_{16}\text{L}_4-1$  treated in different organic solvents at room temperature for one week.

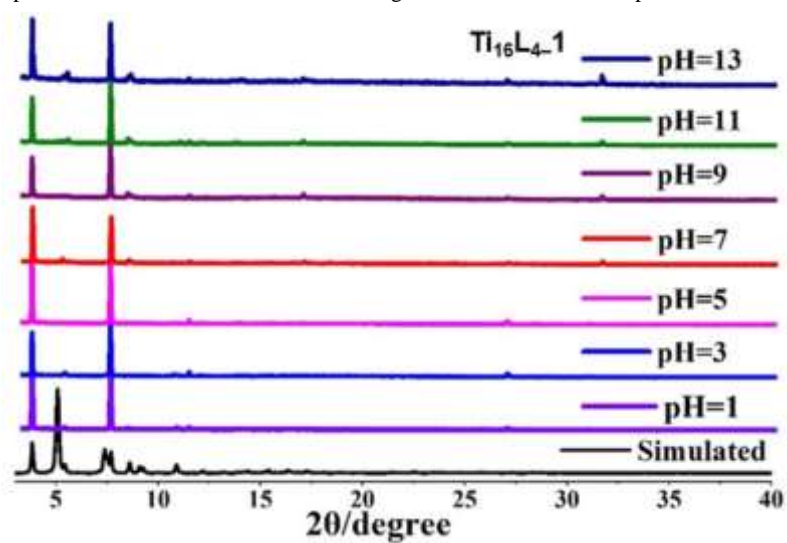

Figure S27. XRD patterns of  $\text{Ti}_{16}\text{L}_4-1$  treated in different pH solutions at room temperature for 24 hours.

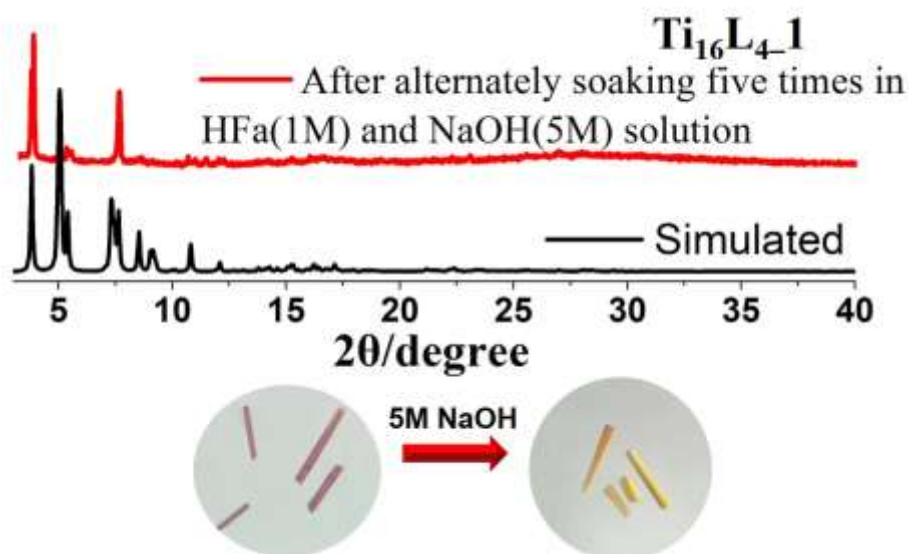

Figure S28. XRD patterns of  $\text{Ti}_{16}\text{L}_4-1$  after alternating soaking in 5M NaOH and 1M HFa solution for five times. After five times of alternating soaking, the crystal is still firm and the color can obviously change between yellow and red.

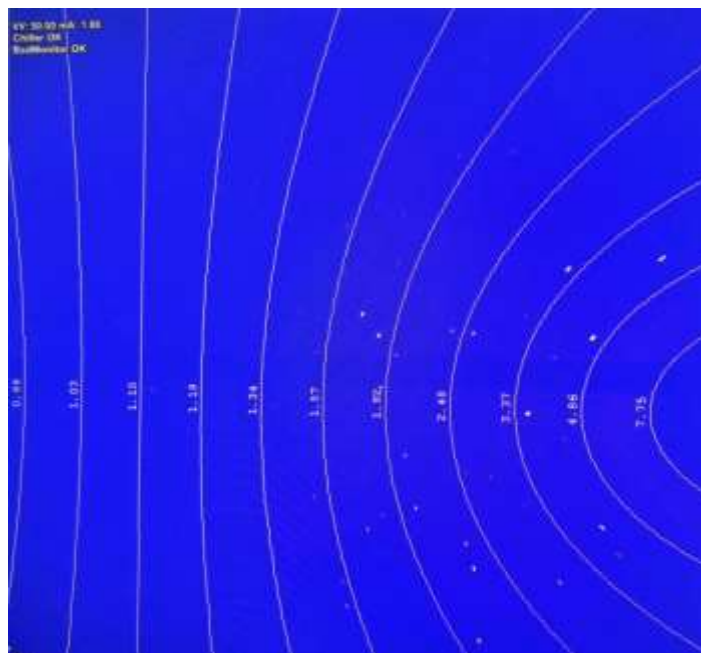

**Figure S29.** The diffraction images of the crystal of **Ti<sub>16</sub>L<sub>4-1</sub>** after alternately soaking in 5M NaOH and 1M HFa solution for five times.

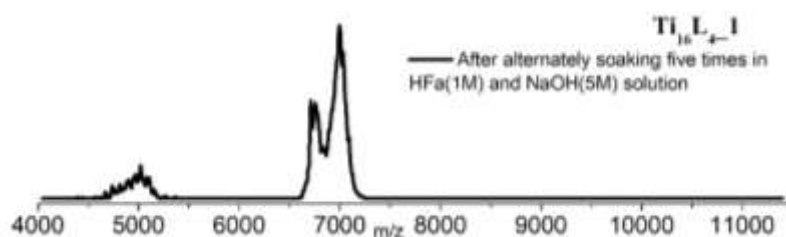

**Figure S30.** The diffraction images of the crystal of **Ti<sub>16</sub>L<sub>4-1</sub>** after alternately soaking in 5M NaOH and 1M HFa solution for five times.

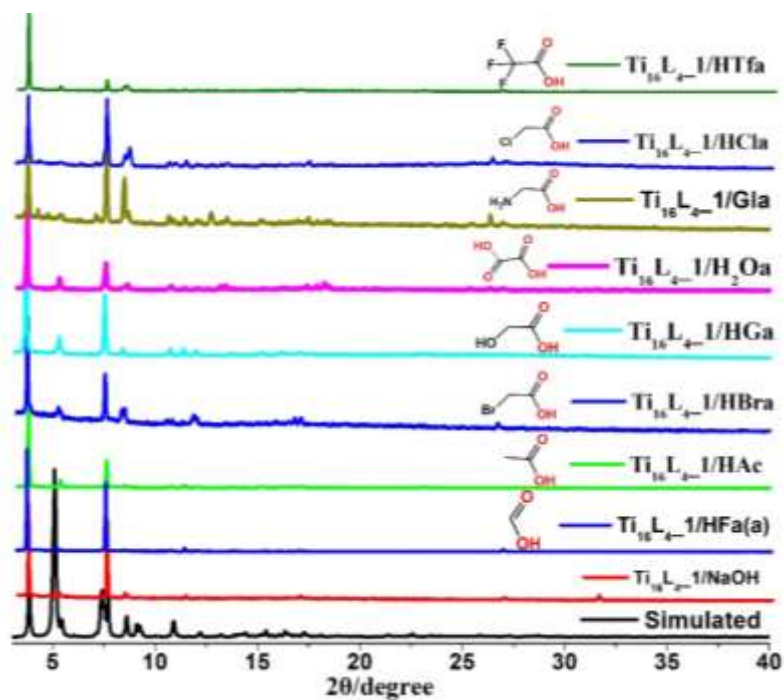

**Figure S31.** XRD patterns of the derived clusters of **Ti<sub>16</sub>L<sub>4-1</sub>** through post substitution methods.

## 4. XPS Measurement

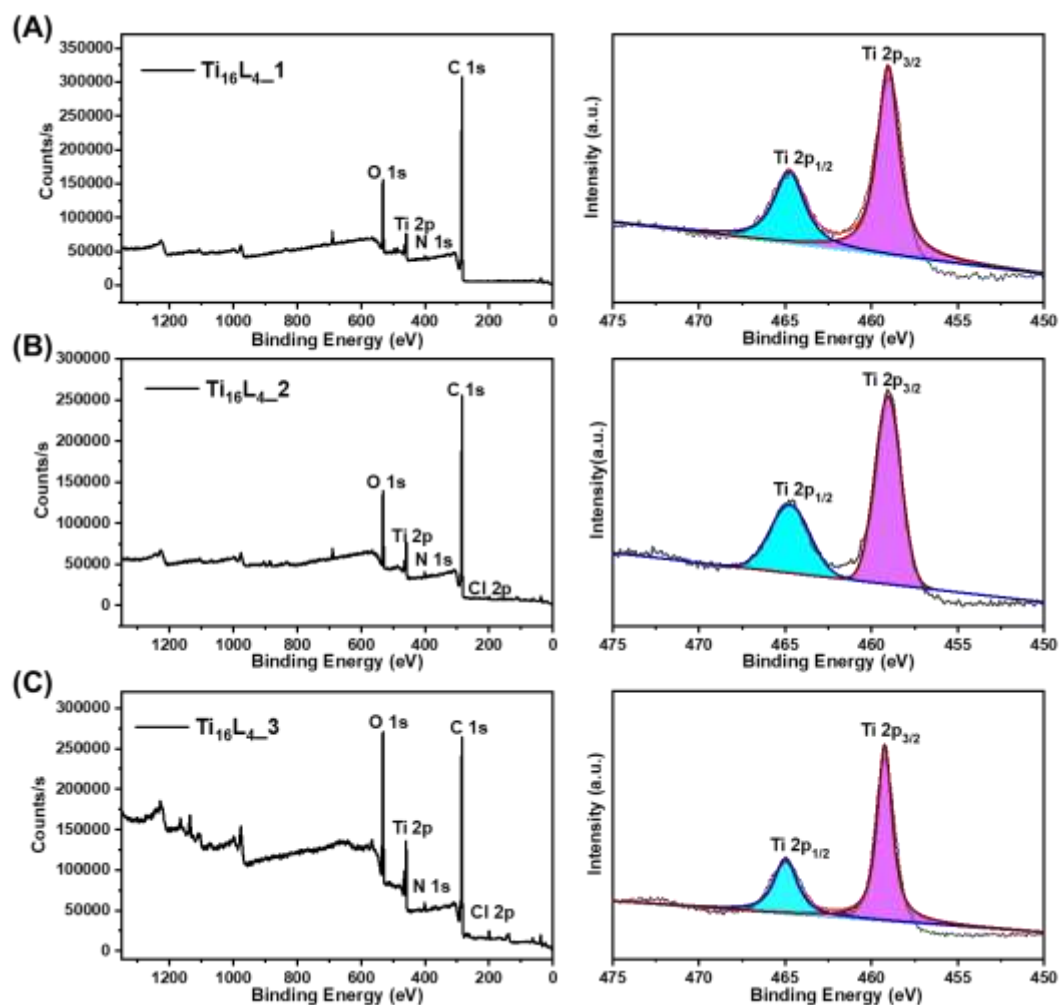

**Figure S32.** XPS Measurements for  $\text{Ti}_{16}\text{L}_4$ . The presence of  $\text{Ti}^{4+}$  has been verified by the XPS analysis. In the case of  $\text{Ti}_{16}\text{L}_4\text{-1}$ , the Ti 2p spectrum exhibits distinct Ti 2p<sub>1/2</sub> (ca. 464.9 eV) and Ti 2p<sub>3/2</sub> (ca. 459.0 eV) regions, showing a binding energy difference of 5.9 eV. This discrepancy indicates the presence of  $\text{Ti}^{4+}$ . In the XPS spectra of  $\text{Ti}_{16}\text{L}_4\text{-2}$  and  $\text{Ti}_{16}\text{L}_4\text{-3}$ , shifts in the binding energy peak of Ti are observed, attributed to ligand modifications.

## 5. TG Measurement

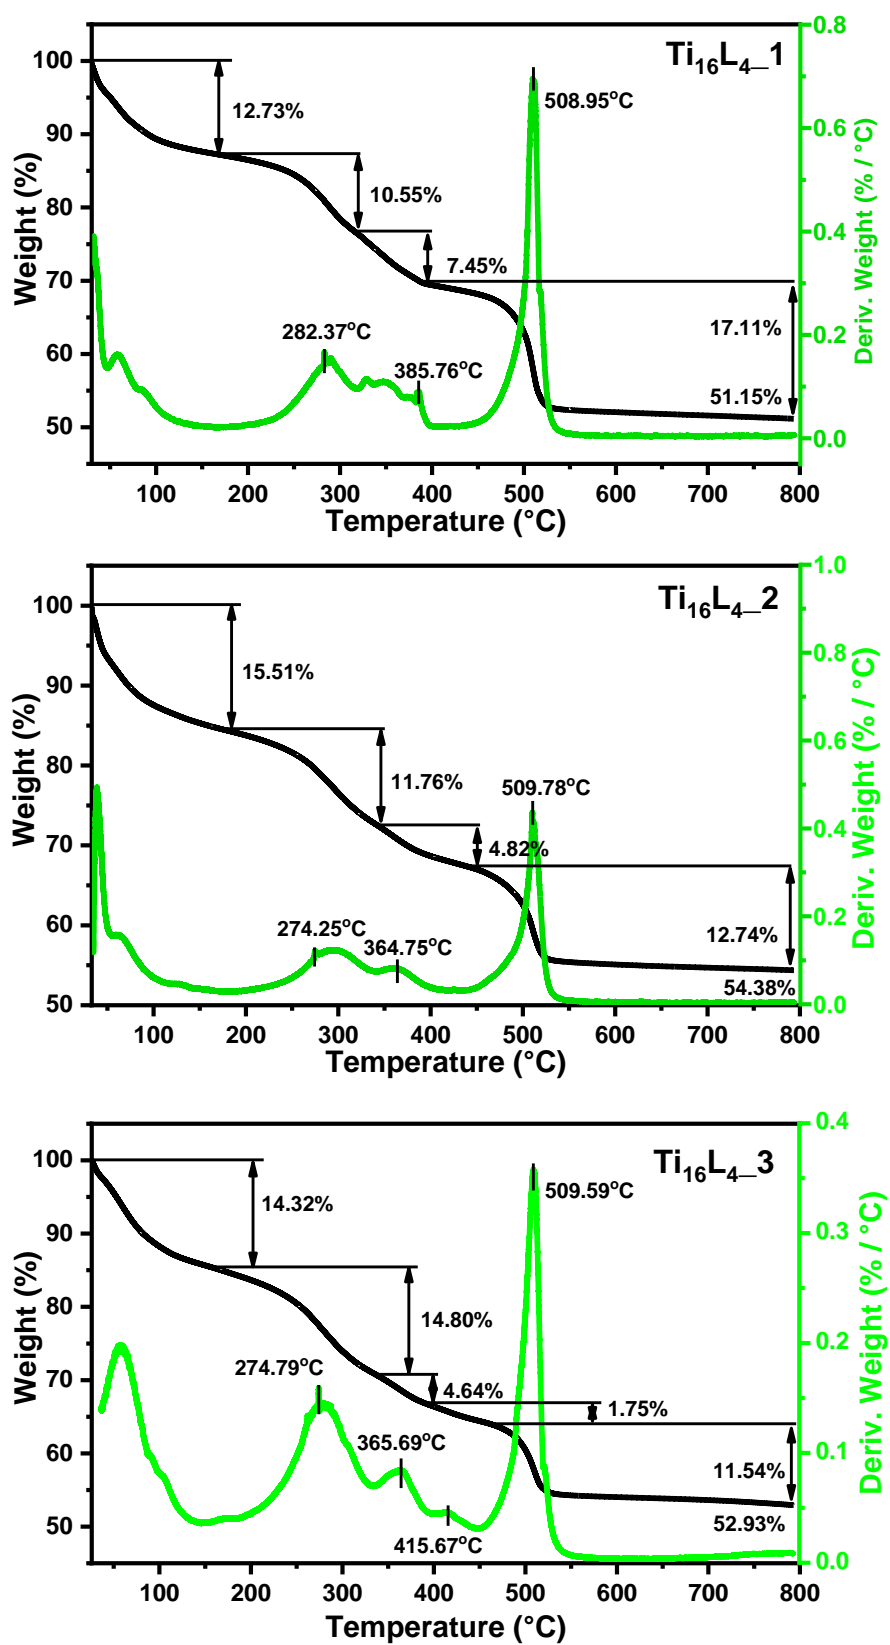

Figure S33. TGA curve of  $\text{Ti}_{16}\text{L}_4\text{-1}$ ,  $\text{Ti}_{16}\text{L}_4\text{-2}$  and  $\text{Ti}_{16}\text{L}_4\text{-3}$ .

## 6. IR Spectra

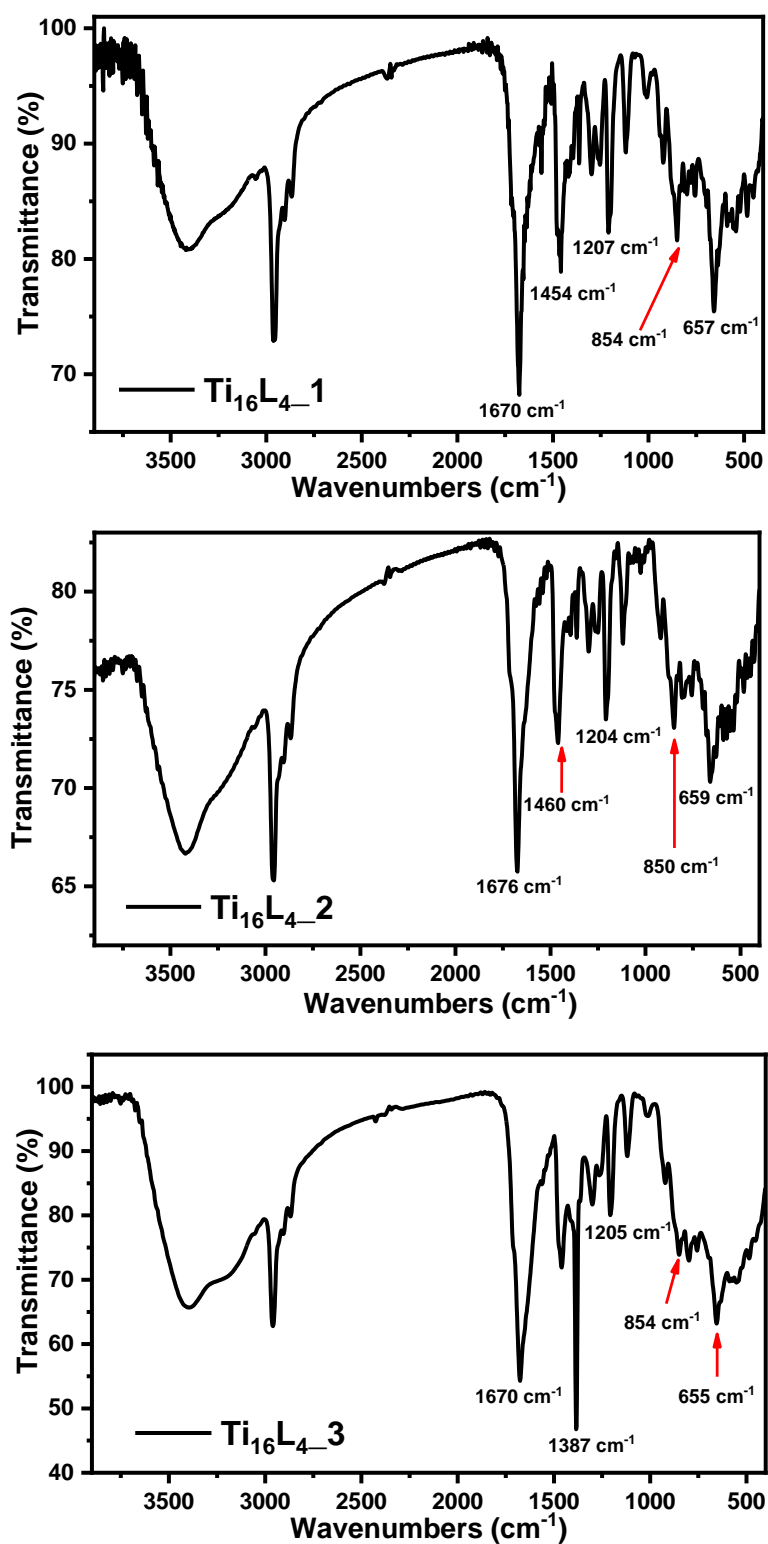

**Figure S34.** IR spectra of crystal samples of  $\text{Ti}_{16}\text{L}_4\text{-1}$ ,  $\text{Ti}_{16}\text{L}_4\text{-2}$  and  $\text{Ti}_{16}\text{L}_4\text{-3}$ . In the high wavenumber region, the aboard absorption bands from 3700 to 3200  $\text{cm}^{-1}$  stem from the  $\nu(\text{O-H})$  stretching mode of  $-\text{OH}$  groups or water molecules. The weak absorption bands at 3000–2800  $\text{cm}^{-1}$  can be ascribed to the stretching vibration modes of C–H bonds in aromatic rings and tert butyl group. The characteristic stretching vibrations  $\nu(\text{CO}_2^-)$  of in carboxylic groups and  $\nu(\text{C}=\text{C})$  in benzene rings are overlapped from 1600  $\text{cm}^{-1}$  to 1400  $\text{cm}^{-1}$ . The characteristic bands of Ti–O–C and Ti–O–Ti appears in the ranges of 1000–1200 and 700–800  $\text{cm}^{-1}$ , respectively.<sup>1-2</sup>

## Reference

1. Zhang, G., Hou, J., Li, M., Tung, C., Wang, Y., Counteranion-Stabilized Titanium(IV) Isopolyoxocationic Clusters Isolated from Water. *Inorg. Chem.* 2016, **55**, 4704-4709.
2. Zhang, G., Liu, C., Long, D., Cronin, L., Tung, C., Wang, Y., Water-Soluble Pentagonal-Prismatic Titanium-Oxo Clusters. *J. Am. Chem. Soc.* 2016, **138**, 11097–11100.

## 7. Energy Dispersive X-ray (EDX) Spectroscopic Analysis

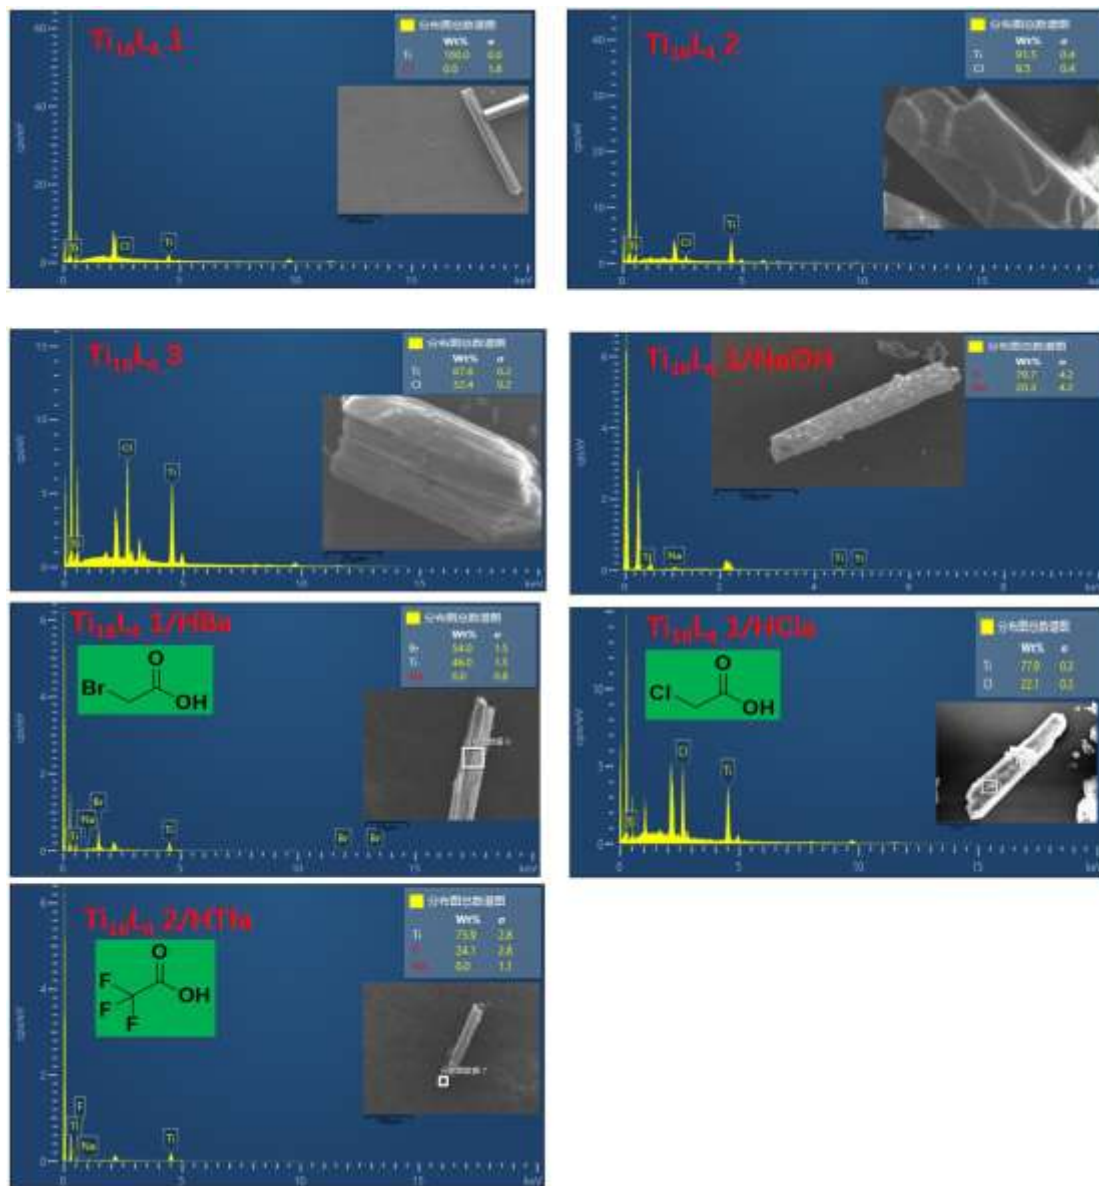

**Figure S35.** The EDS patterns of **Ti<sub>16</sub>L<sub>4</sub>-1**, **Ti<sub>16</sub>L<sub>4</sub>-2**, **Ti<sub>16</sub>L<sub>4</sub>-3**, **Ti<sub>16</sub>L<sub>4</sub>-1/NaOH**, **Ti<sub>16</sub>L<sub>4</sub>-1/HBA**, **Ti<sub>16</sub>L<sub>4</sub>-1/HCl** and **Ti<sub>16</sub>L<sub>4</sub>-2/HTfa**. The presence of Cl<sup>-</sup> ions in **Ti<sub>16</sub>L<sub>4</sub>-2** and **Ti<sub>16</sub>L<sub>4</sub>-3**, Na ions in **Ti<sub>16</sub>L<sub>4</sub>-1/NaOH**, Br in **Ti<sub>16</sub>L<sub>4</sub>-1/HBA**, Cl in **Ti<sub>16</sub>L<sub>4</sub>-1/HCl**, and F in **Ti<sub>16</sub>L<sub>4</sub>-2/HTfa** can be demonstrated by EDS.

## 8. CO<sub>2</sub> Adsorption

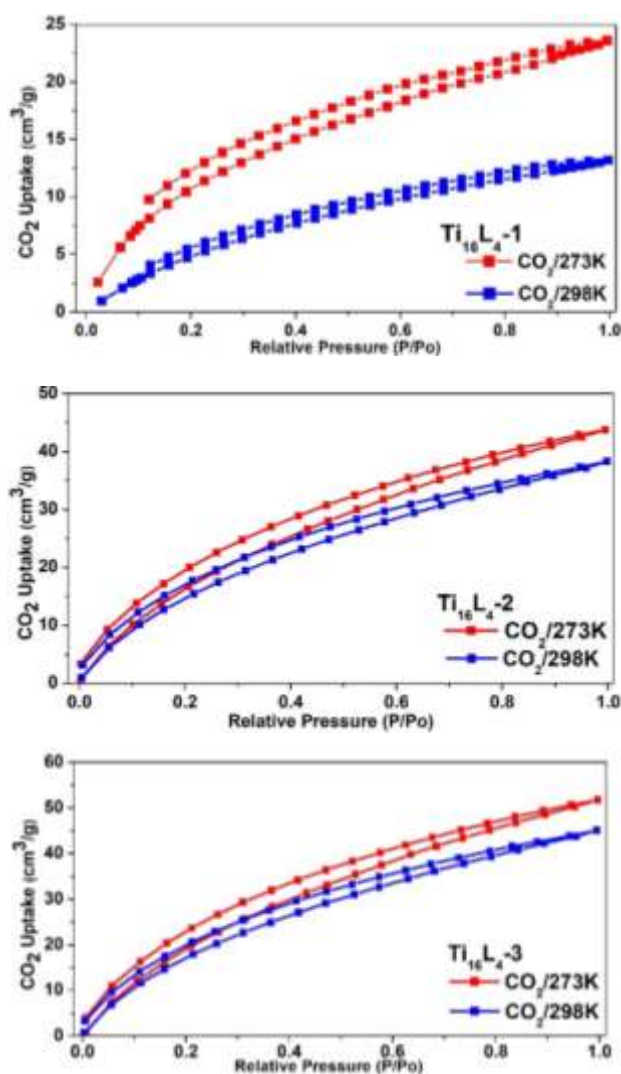

Figure S36. CO<sub>2</sub> adsorption and desorption isotherms of Ti<sub>16</sub>L<sub>4</sub>-1, Ti<sub>16</sub>L<sub>4</sub>-2 and Ti<sub>16</sub>L<sub>4</sub>-3 at 273 K (red) and 298 K (blue).

## 9. Dynamic Light Scattering Measurement

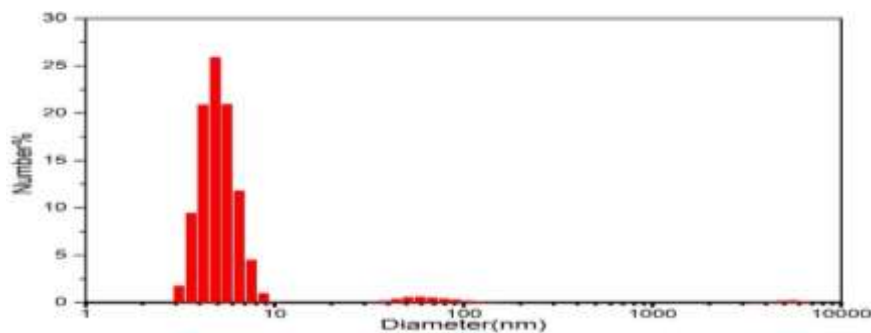

Dynamic light scattering (DLS) measurement is performed on a Malvern Zetasizer 1000HSA. The sample of Ti<sub>16</sub>L<sub>4</sub>-1 was dissolved in chloroform solution by ultrasonic dispersion. The solution was centrifuged. The clear solution was sucked out and placed in a quartz cuvette for measurement. In the range of 1-1000 nm, only one size distribution is observed with an average diameter of 4.2 nm, which matches the size of the cage (~3.0 nm) and verifies the existence of the cluster molecules in solution.

Figure S37. DLS of Ti<sub>16</sub>L<sub>4</sub>-1 in chloroform solution.

## 10. Wettability of $\text{Ti}_{16}\text{L}_4$ Rings

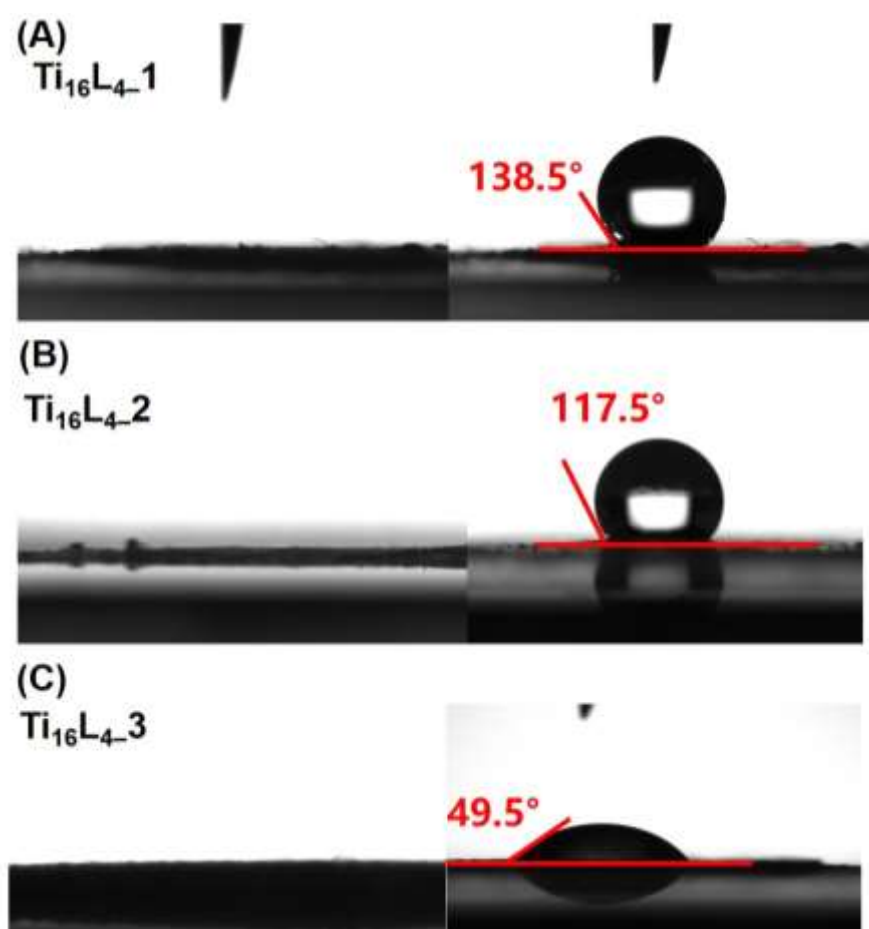

**Figure S38.** Contact angle patterns for  $\text{Ti}_{16}\text{L}_{4-1/2/3}$ . The contact angles measured on as-synthesized powder samples of  $\text{Ti}_{16}\text{L}_{4-1/2/3}$  were  $138.5^\circ$ ,  $117.5^\circ$  and  $49.5^\circ$ , respectively.

## 11. Photocatalysis

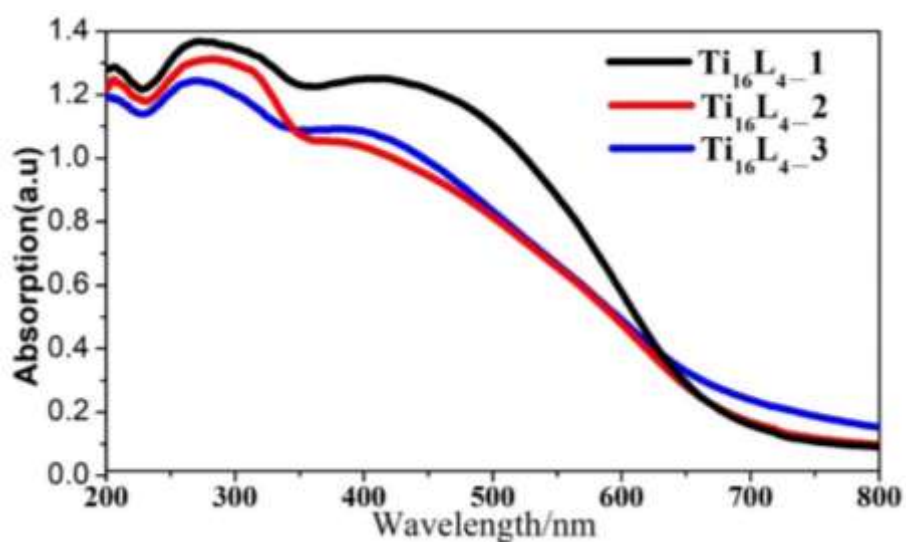

**Figure S39.** Solid state UV-Vis spectra of  $\text{Ti}_{16}\text{L}_{4-1/2/3}$ .

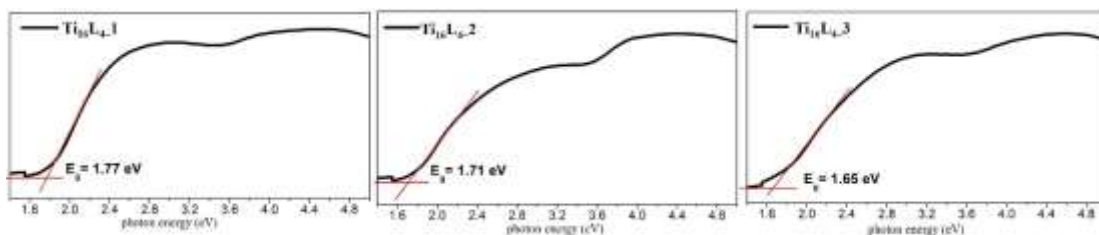

Figure S40. Tauc plot of  $\text{Ti}_{16}\text{L}_4\text{-1/2/3}$  derived from UV-vis spectra.

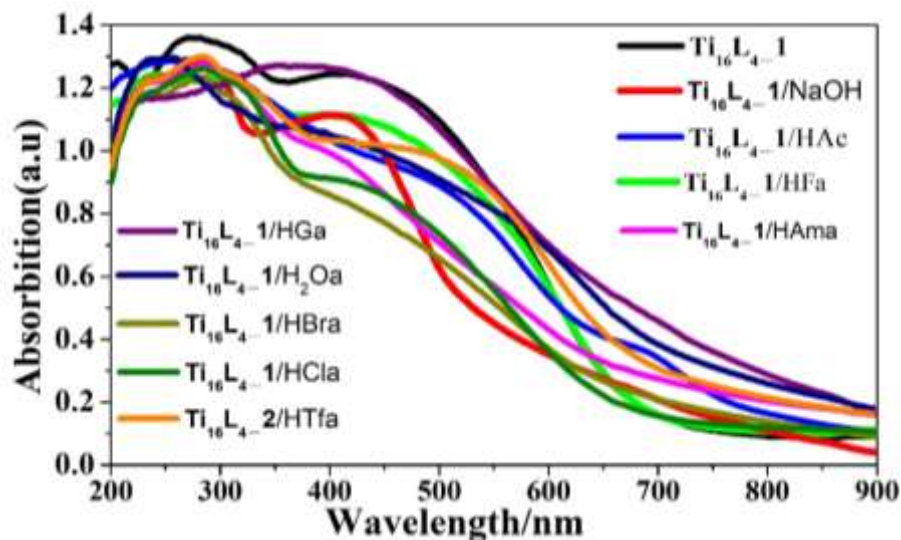

Figure S41. Solid state UV-Vis spectra of the derived  $\text{Ti}_{16}\text{L}_4$ .

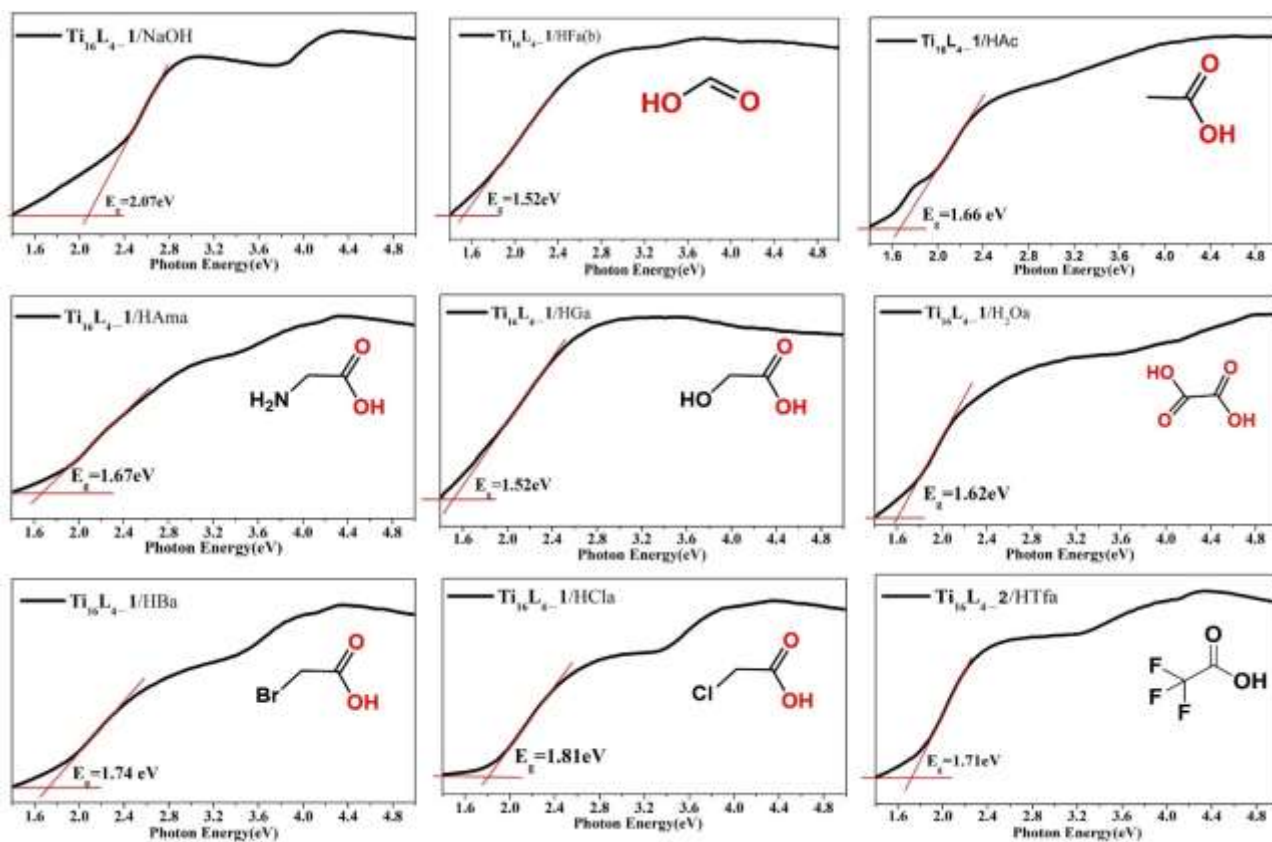

Figure S42. Tauc plot of the derived cluster of  $\text{Ti}_{16}\text{L}_4\text{-1}$  derived from UV-vis spectrum.

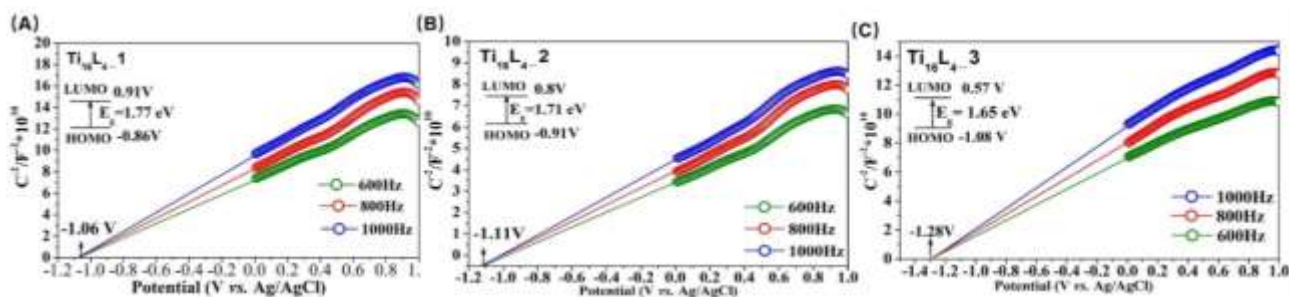

**Figure S43.** Mott-Schottky plots for  $\text{Ti}_{16}\text{L}_4\text{-1/2/3}$  in 0.2 M  $\text{Na}_2\text{SO}_4$  aqueous solution. Insets are the energy diagrams of the HOMO and LUMO levels.

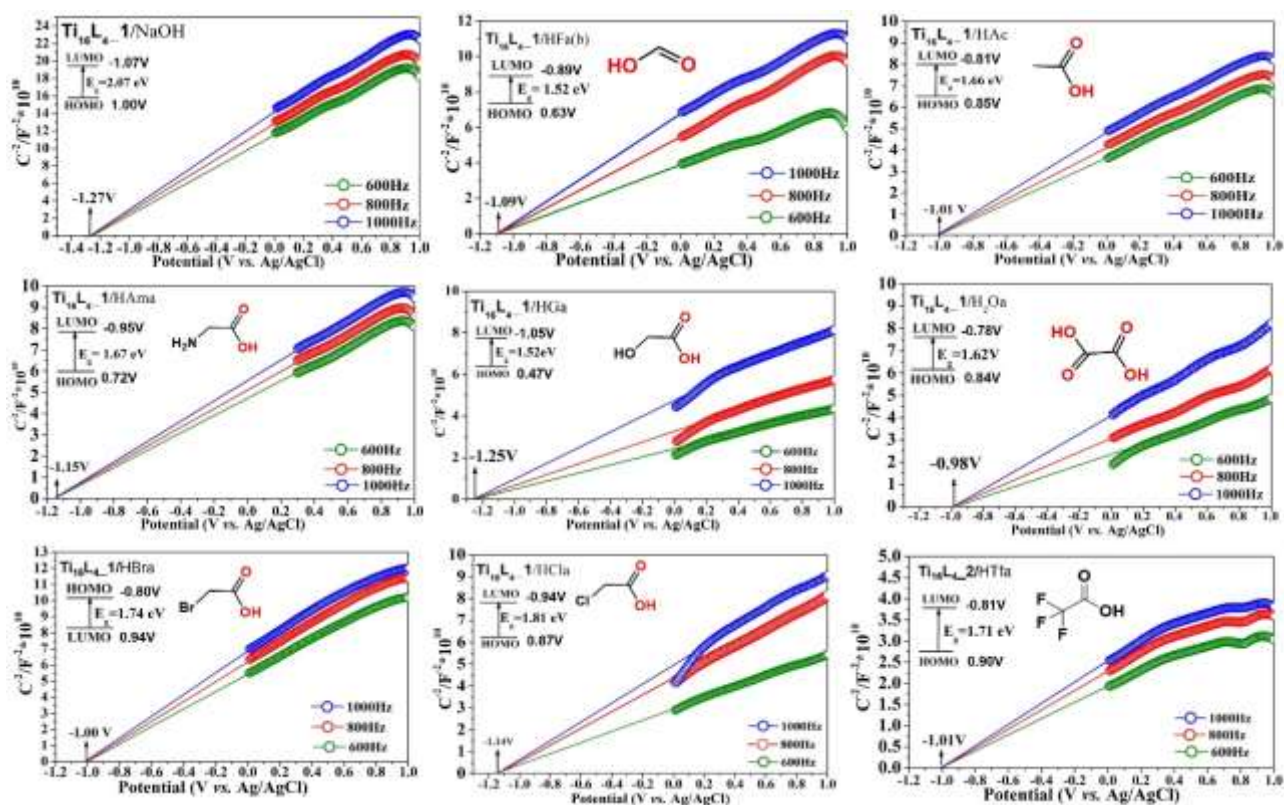

**Figure S44.** Mott-Schottky plots for the derived cluster of  $\text{Ti}_{16}\text{L}_4\text{-1}$  in 0.2 M  $\text{Na}_2\text{SO}_4$  aqueous solution. Insets are the energy diagrams of the HOMO and LUMO levels.

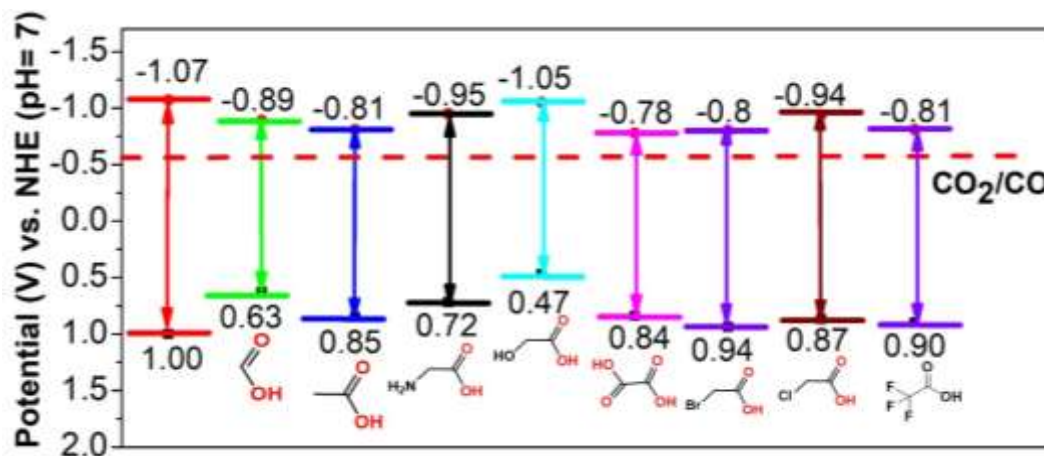

**Figure S45.** Band structure diagram for the derived cluster of  $\text{Ti}_{16}\text{L}_4$ .

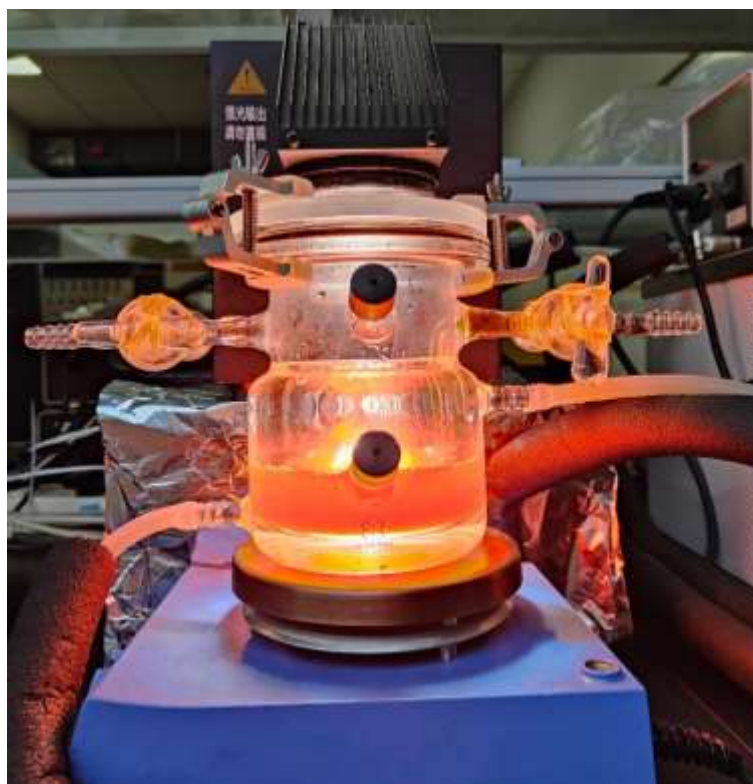

Figure S46. The picture of photocatalytic reactor.

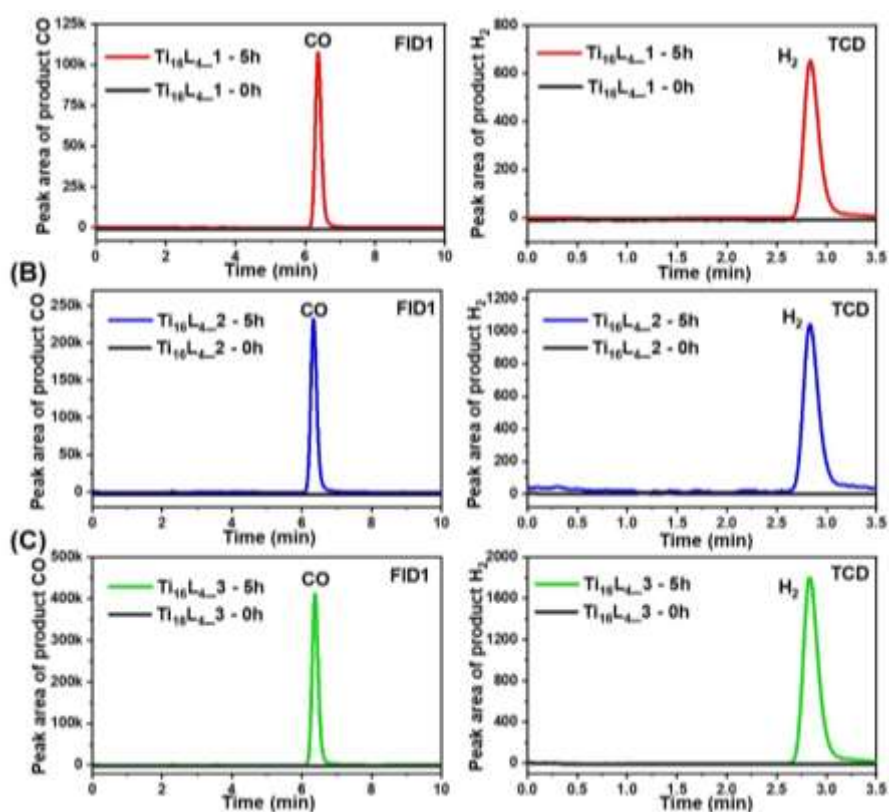

Figure S47. GC analysis of the gaseous reaction products for  $\text{Ti}_{16}\text{L}_4_1/2/3$  by using the FID and TCD.

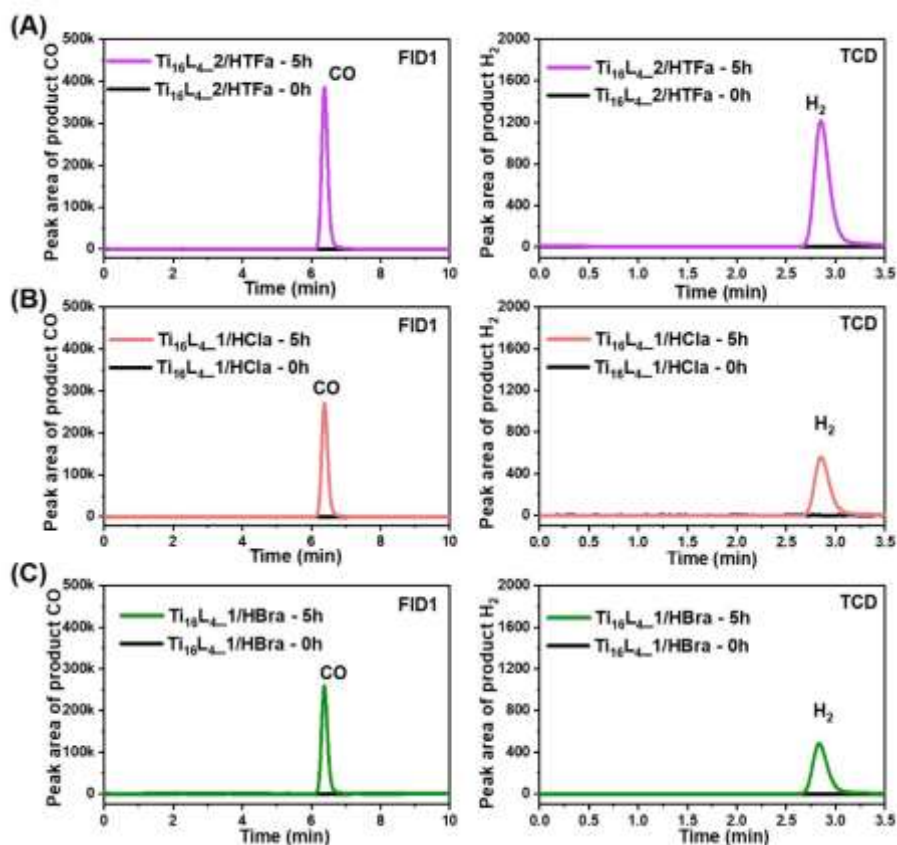

Figure S48. GC analysis of the gaseous reaction products for  $\text{Ti}_{16}\text{L}_4\text{-2/HTFa}$ ,  $\text{Ti}_{16}\text{L}_4\text{-1/HClA}$  and  $\text{Ti}_{16}\text{L}_4\text{-2/HBra}$  by using the FID and TCD.

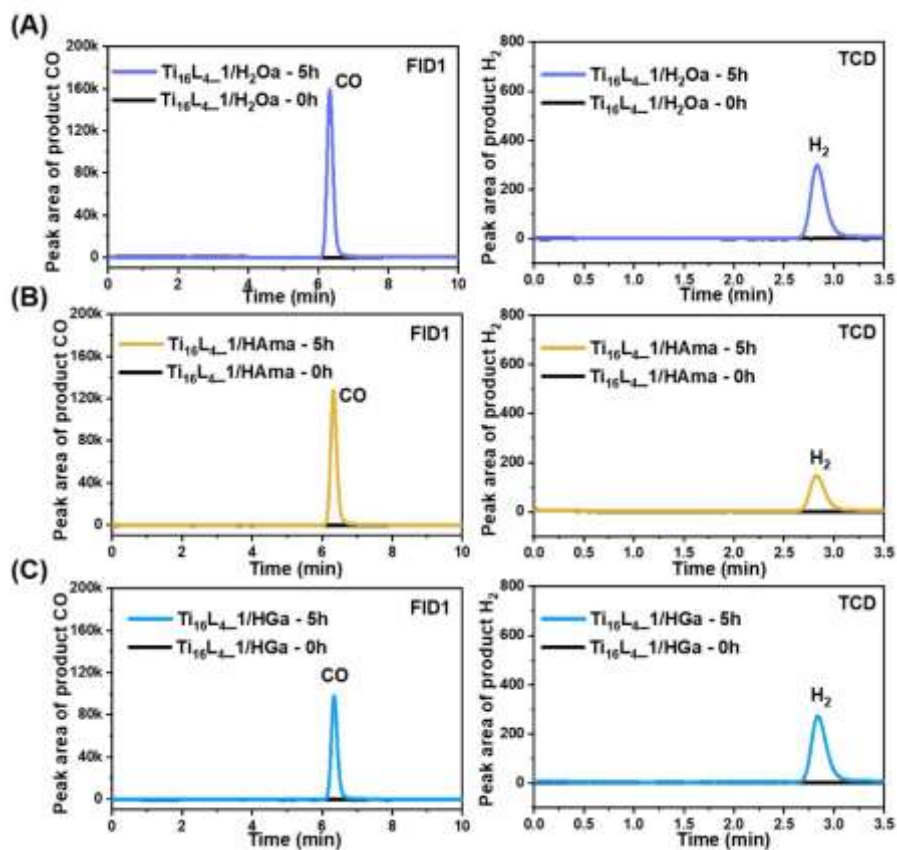

**Figure S49.** GC analysis of the gaseous reaction products for  $\text{Ti}_{16}\text{L}_4\text{-1}/\text{H}_2\text{Oa}$ ,  $\text{Ti}_{16}\text{L}_4\text{-1}/\text{HAm}$  and  $\text{Ti}_{16}\text{L}_4\text{-1}/\text{HG}$  by using the FID and TCD.

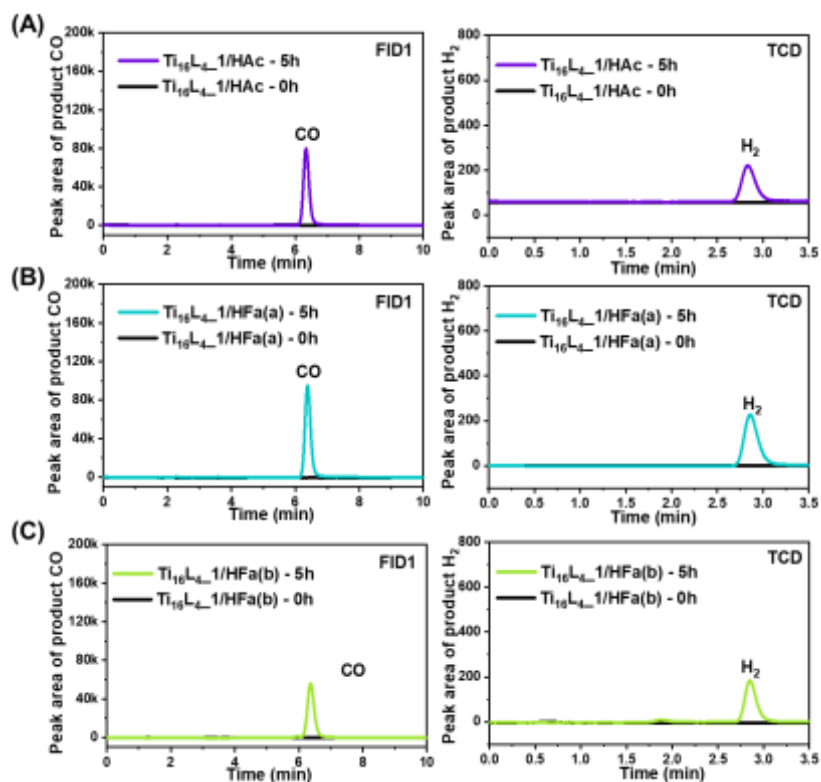

**Figure S50.** GC analysis of the gaseous reaction products for  $\text{Ti}_{16}\text{L}_4\text{-1}/\text{HAc}$ ,  $\text{Ti}_{16}\text{L}_4\text{-1}/\text{HFa(a)}$  and  $\text{Ti}_{16}\text{L}_4\text{-1}/\text{HFa(b)}$  by using the FID and TCD.

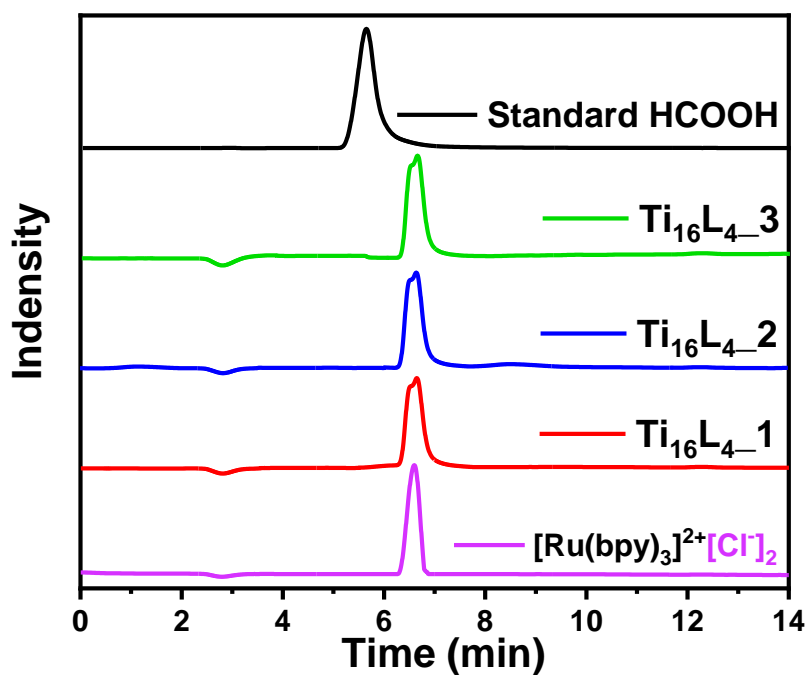

**Figure S51.** Analysis of the liquid reaction products generated in photocatalytic system by ion chromatography.

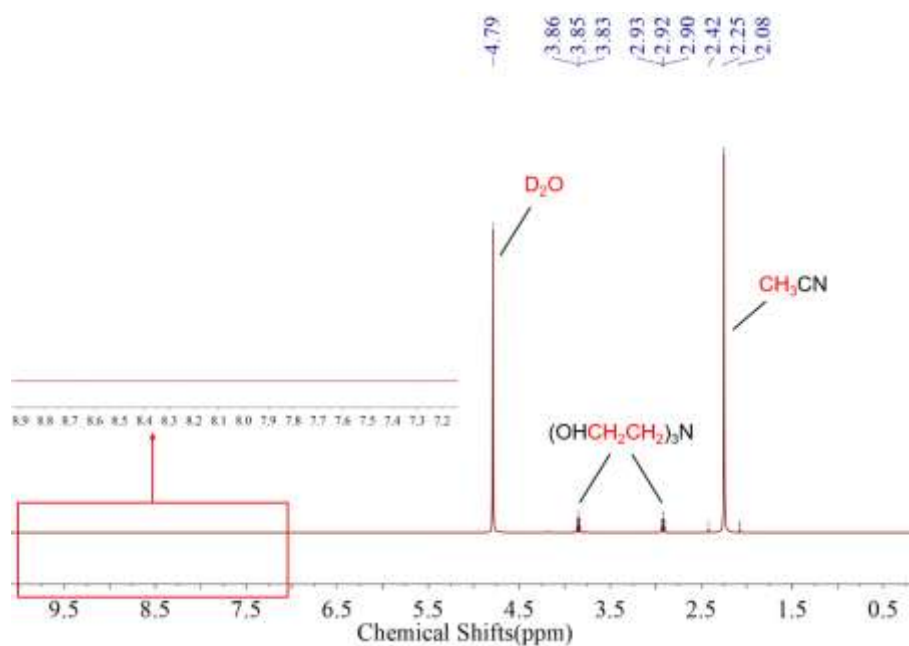

**Figure S52.**  $^1\text{H}$  NMR spectrum of the liquid phase from the reaction system after visible-light irradiation.

**Table S4.** The photocatalysis results of the controlled experiments under different reaction conditions.

| Entry | Cat.                       | Light      | Photosensitizers                                                 | Sacrificial Agent | solvents                                        | atmosphere    | $\text{CO}/\mu\text{mol}$ | $\text{H}_2/\mu\text{mol}$ |
|-------|----------------------------|------------|------------------------------------------------------------------|-------------------|-------------------------------------------------|---------------|---------------------------|----------------------------|
| 1     | <b>Ti<sub>16</sub>L4-1</b> | Xenon lamp | $[\text{Ru}(\text{bpy})_3]\text{Cl}_2 \cdot 6\text{H}_2\text{O}$ | TEOA              | $\text{CH}_3\text{CN}/\text{H}_2\text{O}$ (4:1) | $\text{CO}_2$ | 12.02                     | 0.07                       |
| 2     | <b>Ti<sub>16</sub>L4-2</b> | Xenon lamp | $[\text{Ru}(\text{bpy})_3]\text{Cl}_2 \cdot 6\text{H}_2\text{O}$ | TEOA              | $\text{CH}_3\text{CN}/\text{H}_2\text{O}$ (4:1) | $\text{CO}_2$ | 29.99                     | 0.44                       |
| 3     | <b>Ti<sub>16</sub>L4-3</b> | Xenon lamp | $[\text{Ru}(\text{bpy})_3]\text{Cl}_2 \cdot 6\text{H}_2\text{O}$ | TEOA              | $\text{CH}_3\text{CN}/\text{H}_2\text{O}$ (4:1) | $\text{CO}_2$ | 60.57                     | 2.34                       |
| 4     | ×                          | Xenon lamp | $[\text{Ru}(\text{bpy})_3]\text{Cl}_2 \cdot 6\text{H}_2\text{O}$ | TEOA              | $\text{CH}_3\text{CN}/\text{H}_2\text{O}$ (4:1) | $\text{CO}_2$ | 0.325                     | 0                          |
| 5     | <b>Ti<sub>16</sub>L4-1</b> | Dark       | $[\text{Ru}(\text{bpy})_3]\text{Cl}_2 \cdot 6\text{H}_2\text{O}$ | TEOA              | $\text{CH}_3\text{CN}/\text{H}_2\text{O}$ (4:1) | $\text{CO}_2$ | 0                         | 0                          |
| 6     | <b>Ti<sub>16</sub>L4-1</b> | Xenon lamp | $[\text{Ru}(\text{bpy})_3]\text{Cl}_2 \cdot 6\text{H}_2\text{O}$ | ×                 | $\text{CH}_3\text{CN}/\text{H}_2\text{O}$ (4:1) | $\text{CO}_2$ | 0.467                     | 0.125                      |
| 7     | <b>Ti<sub>16</sub>L4-1</b> | Xenon lamp | $[\text{Ru}(\text{bpy})_3]\text{Cl}_2 \cdot 6\text{H}_2\text{O}$ | TEOA              | $\text{CH}_3\text{CN}/\text{H}_2\text{O}$ (4:1) | $\text{N}_2$  | 0                         | 0.803                      |
| 8     | <b>Ti<sub>16</sub>L4-1</b> | Xenon lamp | Tris(2-phenylpyridinato)iridium                                  | TEOA              | $\text{CH}_3\text{CN}/\text{H}_2\text{O}$ (4:1) | $\text{CO}_2$ | 0.239                     | 0.968                      |
| 9     | <b>Ti<sub>16</sub>L4-1</b> | Xenon lamp | $[\text{Ru}(\text{bpy})_3]\text{Cl}_2 \cdot 6\text{H}_2\text{O}$ | TEOA              | $\text{H}_2\text{O}$                            | $\text{CO}_2$ | 0.139                     | 0.868                      |

<sup>a</sup> Reaction conditions: catalyst (3mg), photosensitizer (10 mg), sacrificial agent (TEOA, 5 mL), solvent (10 mL), reaction time(5 h);

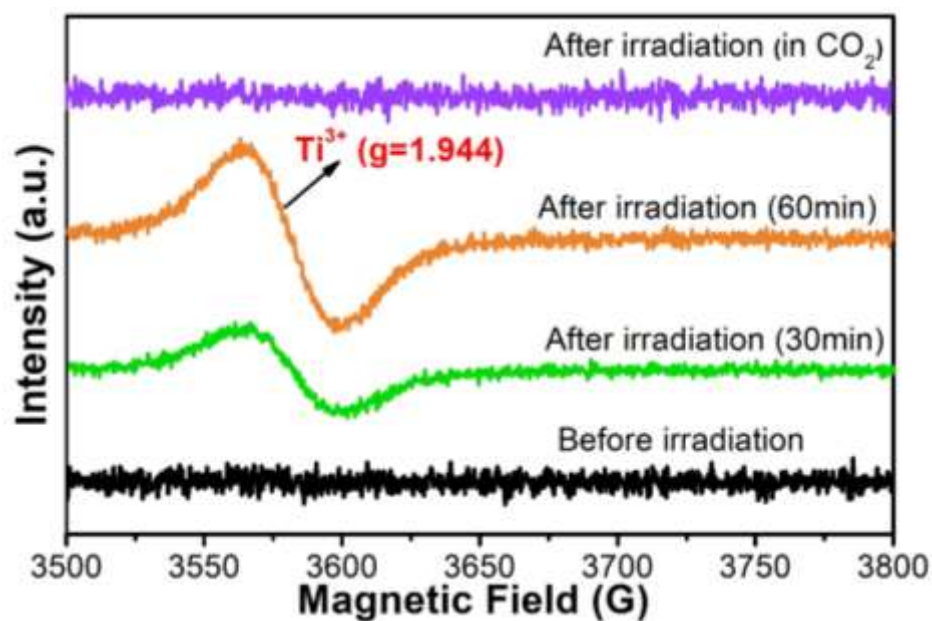

**Figure S53.** ESR spectrum of **Ti<sub>16</sub>L<sub>4</sub>\_1** cluster before and after light irradiation. ESR spectra were obtained on a Bruker A300 spectrophotometer at 298 K. EPR spectra were obtained using 1–20 mW microwave power and 100 kHz field modulation with the amplitude set to 1 G. The  $g$ -values for each EPR spectrum were extracted from simulations performed using EasySpin (v5.2.23).

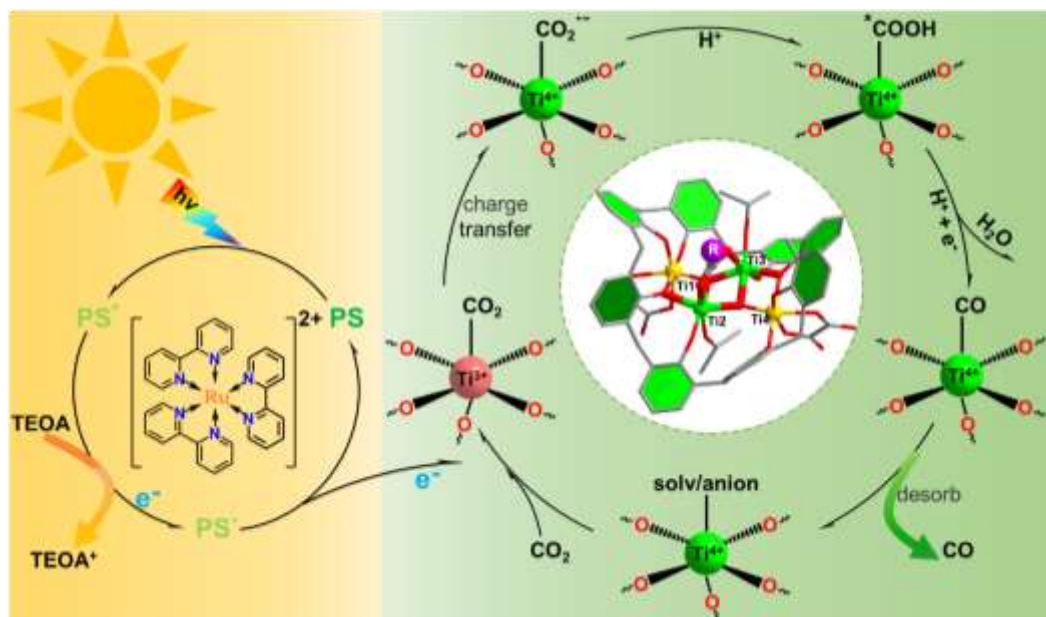

**Figure S54.** Reaction mechanism diagram.

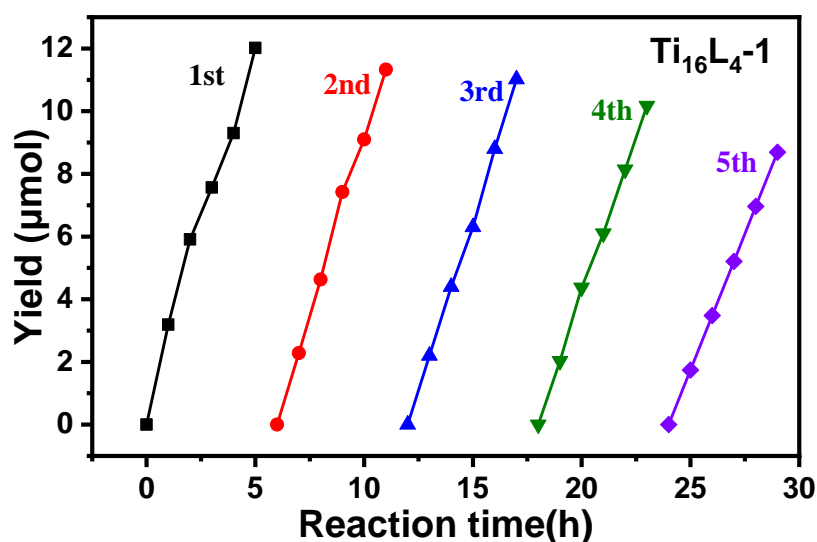

**Figure S55.** The photocatalysis results of the controlled experiments under different reaction conditions.

**Table S5.** The catalytic activity comparison of potential active sites in Ti<sub>16</sub>L<sub>4</sub>-1/2/3.

| Entry                              | CO yield   | TON    | TON <sub>Ti</sub> |
|------------------------------------|------------|--------|-------------------|
| Ti <sub>16</sub> L <sub>4</sub> _3 | 50.67 μmol | 120.69 | 15.09             |
| Ti <sub>16</sub> L <sub>4</sub> _2 | 29.99 μmol | 70.96  | 8.87              |
| Ti <sub>16</sub> L <sub>4</sub> _1 | 12.02 μmol | 28.25  | 3.53              |

Turnover number (TON) = mol (CO yield) / mol (catalyst)

Turnover number (TON<sub>Ti</sub>) = mol (CO yield) / mol (Ti<sup>4+</sup> active sites)

We have demonstrated through experiments that Ti<sub>16</sub>L<sub>4</sub> has 8 flexible coordination sites, namely active sites.

**Table S6.** Performance comparison of cluster-based photocatalysts for photocatalytic CO<sub>2</sub> reduction.

| Photocatalyst                       | Photosensitizers                                          | Sacrificial Agent | Reaction solvent              | CO/μmol             | H <sub>2</sub> /μmol | Reference |
|-------------------------------------|-----------------------------------------------------------|-------------------|-------------------------------|---------------------|----------------------|-----------|
| Co-MOF-74                           | [Ru(bpy) <sub>3</sub> ]Cl <sub>2</sub> ·6H <sub>2</sub> O | TEOA              | Acetonitrile/H <sub>2</sub> O | 11.7/0.5 h          | 7.3/0.5 h            | 1         |
| Mn-MOF-74                           | [Ru(bpy) <sub>3</sub> ]Cl <sub>2</sub> ·6H <sub>2</sub> O | TEOA              | Acetonitrile/H <sub>2</sub> O | 1.5/0.5 h           | 2.9/0.5 h            | 1         |
| Zn-ZIF-8                            | [Ru(bpy) <sub>3</sub> ]Cl <sub>2</sub> ·6H <sub>2</sub> O | TEOA              | Acetonitrile/H <sub>2</sub> O | 2.1/0.5 h           | 2.4/0.5 h            | 1         |
| Co <sub>6</sub> -MOF                | [Ru(bpy) <sub>3</sub> ]Cl <sub>2</sub> ·6H <sub>2</sub> O | TEOA              | Acetonitrile/H <sub>2</sub> O | 39.36/2 h           | 28.13/2 h            | 1         |
| Co-ZIF-9                            | [Ru(bpy) <sub>3</sub> ]Cl <sub>2</sub> ·6H <sub>2</sub> O | TEOA              | Acetonitrile/H <sub>2</sub> O | 41.8/0.5 h          | 29.9/0.5 h           | 2         |
| CuNi-L <sup>2</sup>                 | [Ru(bpy) <sub>3</sub> ]Cl <sub>2</sub> ·6H <sub>2</sub> O | TEOA              | Acetonitrile/H <sub>2</sub> O | 4.6/8 h             | 0.32/8 h             | 3         |
| TCOF-MnMo <sub>6</sub>              | without                                                   | without           | H <sub>2</sub> O              | 7.97/24 h           | —                    | 4         |
| RO-4                                | without                                                   | without           | H <sub>2</sub> O              | 0.4/4 h             | —                    | 5         |
| Co(P <sub>4</sub> Mo <sub>6</sub> ) | [Ru(bpy) <sub>3</sub> ]Cl <sub>2</sub> ·6H <sub>2</sub> O | TEOA              | H <sub>2</sub> O              | 0.32/10 h           | 0.012/10 h           | 6         |
| Co <sub>16</sub> -V <sub>4</sub>    | [Ru(phen) <sub>3</sub> ](PF <sub>6</sub> ) <sub>2</sub>   | TEOA              | H <sub>2</sub> O              | 3.41/10 h           | —                    | 7         |
| Au@NENU-10                          | without                                                   | without           | H <sub>2</sub> O              | 1.28/5 h            | 0.26/5 h             | 8         |
| BIF-29                              | [Ru(bpy) <sub>3</sub> ]Cl <sub>2</sub> ·6H <sub>2</sub> O | TEOA              | H <sub>2</sub> O              | 166.7/5 h           | 35.0/5 h             | 9         |
| Ti <sub>16</sub> L <sub>4</sub> -3  | [Ru(bpy) <sub>3</sub> ]Cl <sub>2</sub> ·6H <sub>2</sub> O | TEOA              | Acetonitrile/H <sub>2</sub> O | 60.57/5 h           | 2.34/5 h             | This work |
| Ti <sub>16</sub> -C4A               | without                                                   | TEOA              | H <sub>2</sub> O              | HCOOH<br>136.0/12 h | —                    | 10        |
| PTi <sub>16</sub>                   | without                                                   | TEOA              | H <sub>2</sub> O              | HCOOH<br>24.13/18 h | 0.1/18 h             | 11        |
| Ti <sub>6</sub> -Fcde               | without                                                   | TIPA              | H <sub>2</sub> O              | HCOOH<br>35.0/10 h  | —                    | 12        |
| Ti <sub>4</sub> -C8A                | without                                                   | TEOA              | H <sub>2</sub> O              | HCOOH<br>41.51/17 h | 1.07/17 h            | 13        |

## Reference

1. Zhao, J., Wang, Q., Sun, C.Y., Zheng, T. T., Yan, L.K., Li, M. T., Shao, K. Z., Wang, X. L. & Su, Z. M. A hexanuclear cobalt metal–organic framework for efficient CO<sub>2</sub> reduction under visible light. *J. Mater. Chem. A*. 2017, **5**, 12498.
2. Wang, S. B., Yao, W. S., Lin, J. L., Ding Z. X. & Wang, X. C. Cobalt Imidazolate Metal–Organic Frameworks Photosplit CO<sub>2</sub> under Mild Reaction Conditions. *Angew. Chem. Int. Ed.* 2014, **53**, 1034-1038.
3. Yuan, L., Zhang, L., Li, X.-X., Liu, J., Liu, J.-J., Dong, L.-Z., Li, D.-S., Li, S.-L. & Lan, Y.-Q. Uncovering the synergistic photocatalytic behavior of bimetallic molecular catalysts. *Chinese Chem. Lett.* 2023, **34** 107146.
4. Li, Q., Chang, J.-N., Wang, Z., Lu, M., Guo, C., Zhang, M., Yu, T.-Y., Chen, Y., Li, S.-L., & Lan, Y.-Q. Modulated Connection Modes of Redox Units in Molecular Junction Covalent Organic Frameworks for Artificial Photosynthetic Overall Reaction. *J. Am. Chem. Soc.*, 2022, **144**, 1861–1871.
5. Li, X.-X., Zhang, L., Yuan, L., Wang, T., Dong, L.Z., Huang, K., Liu, J. & Lan, Y.-Q. Constructing crystalline redox catalyst to achieve efficient CO<sub>2</sub> photoreduction reaction in water vapor. *Chem. Eng. J.* 2022, **442**, 136157.
6. J. Du, Y. Ma, X. Xin, H. Na, Y. Zhao, H. Tan, Z. Han, Y. Li, Z. Kang, Reduced polyoxometalates and bipyridine ruthenium complex forming a tunable photocatalytic system for high efficient CO<sub>2</sub> reduction, *Chem. Eng. J.* 2020, **398** 125518.
7. Qiao, L., Song, M., Geng, A. & Yao, S. Polyoxometalate-based high-nuclear cobaltevanadiumoxo cluster as efficient catalyst for visible light-driven CO<sub>2</sub> reduction, *Chin. Chem. Lett.* 2019, **30**, 1273e1276.
8. S.-M. Liu, Z. Zhang, X. Li, H. Jia, M. Ren, S. Liu, Ti-substituted keggins-type polyoxotungstate as proton and electron reservoir encaged into metaleorganic framework for carbon dioxide photoreduction, *Adv. Mater. Interfaces* 2018, **5**, 1801062.
9. Zhang, H.-X., Hong, Q.-L., Li, J., Wang, F., Huang, X., Chen, S., Tu, W., Yu, D., Xu, R., Zhou, T. & Zhang, J. Isolated Square-Planar Copper Center in Boron Imidazolate Nanocages for Photocatalytic Reduction of CO<sub>2</sub> to CO, *Angew. Chem. Int. Ed.* 2019, **58**, 11752–11756.
10. Li, N., Lin, J.-M., Li, R.-H., Shi, J.-W., Dong, L.-Z., Liu, J., He, J., & Lan, Y.-Q. Calix[4]arene-Functionalized Titanium-Oxo Compounds for Perceiving Differences in Catalytic Reactivity Between Mono- and Multimetallic Sites. *J. Am. Chem. Soc.* 2023, **145**, 16098–16108.
11. Li, N., Liu, J., Liu, J.-J., Dong, L.-Z., Li, S.-L., Dong, B.-X., Kan, Y.-H. & Y.Q. Lan, Self-Assembly of a phosphate-centered polyoxo-titanium cluster: discovery of the HeteroatomKeggin family, *Angew. Chem. Int. Ed.* 2019, **58**, 17260e17264.
12. Liu, J.-J., Li, N., Sun, J.-W., Liu, J., Dong, L.-Z., Yao, S.-J., Zhang, L., Xin, Z.-F., Shi, J.-W., Wang, J.-X., Li, S.-L., & Lan, Y.-Q. Ferrocene-Functionalized Polyoxo-Titanium Cluster for CO<sub>2</sub> Photoreduction. *ACS Catal.* 2021, **11**, 4510–4519.
13. Li, N., Liu, J.-J., Sun, J.-W., Dong, B.-X., Dong, L.-Z., Yao, S.-J., Xin, Z., Li, S.-L., & Lan, Y.-Q. Calix[8]arene-constructed stable polyoxo-titanium clusters for efficient CO<sub>2</sub> photoreduction. *Green Chem.* 2020, **22**, 5325-5332.

**Table S7** Overview of photocatalytic CO production using Ti<sub>16</sub>L<sub>4</sub> derivatives as catalysts.

| Sample                                                   | Ti <sub>16</sub> L <sub>4</sub> -1 | Ti <sub>16</sub> L <sub>4</sub> -2 | Ti <sub>16</sub> L <sub>4</sub> -3 | Ti <sub>16</sub> L <sub>4</sub> -1/NaOH | Ti <sub>16</sub> L <sub>4</sub> -1/HF(a) | Ti <sub>16</sub> L <sub>4</sub> -1/HF(b) | Ti <sub>16</sub> L <sub>4</sub> -1/HAc |
|----------------------------------------------------------|------------------------------------|------------------------------------|------------------------------------|-----------------------------------------|------------------------------------------|------------------------------------------|----------------------------------------|
| CO production<br>(μmol g <sup>-1</sup> h <sup>-1</sup> ) | 798.37±<br>44.97                   | 1998.10±<br>158.15                 | 4046.67±<br>243.33                 | 158.24 ± 85.28                          | 911.71±115.65                            | 636.23±19.36                             | 773.87±43.91                           |

  

| Sample                                                   | Ti <sub>16</sub> L <sub>4</sub> -1/H <sub>2</sub> Oa | Ti <sub>16</sub> L <sub>4</sub> -1/HGa | Ti <sub>16</sub> L <sub>4</sub> -1/HBra | Ti <sub>16</sub> L <sub>4</sub> -1/HCl | Ti <sub>16</sub> L <sub>4</sub> -1/HAm | Ti <sub>16</sub> L <sub>4</sub> -2/HTfa |
|----------------------------------------------------------|------------------------------------------------------|----------------------------------------|-----------------------------------------|----------------------------------------|----------------------------------------|-----------------------------------------|
| CO production<br>(μmol g <sup>-1</sup> h <sup>-1</sup> ) | 1535.04±101.19                                       | 961.19±89.20                           | 2404.16±172.73                          | 2632.14±210.71                         | 1228.07±140.51                         | 3879.07±207.31                          |

**Table S8:** Crystallographic data of Ti<sub>16</sub>L<sub>4</sub>-1 after photocatalytic reaction (after five cycle).

| Conditions   | as-synthesized | After photocatalytic reaction |
|--------------|----------------|-------------------------------|
| CCDC         | 2174429        | 2287594                       |
| Cryst. syst. | monoclinic     | monoclinic                    |
| Space group  | C2/c           | C2/c                          |
| A[Å]         | 39.1900(19)    | 39.0491(14)                   |
| b[Å]         | 32.5046(16)    | 32.3507(12)                   |

|                           |               |               |
|---------------------------|---------------|---------------|
| $c[\text{\AA}]$           | 38.1646(18)   | 37.9914(14)   |
| $\beta/^\circ$            | 115.461(2)    | 115.3290(10)  |
| $V[\text{\AA}^3]$         | 43894(4)      | 43379(3)      |
| Goof                      | 43894(4)      | 1.054         |
| $R1/wR2(I > 2\sigma(I))$  | 0.0997/0.2961 | 0.0966/0.2770 |
| $R1/wR2(\text{all data})$ | 0.1166/0.3132 | 0.1124/0.2955 |

---

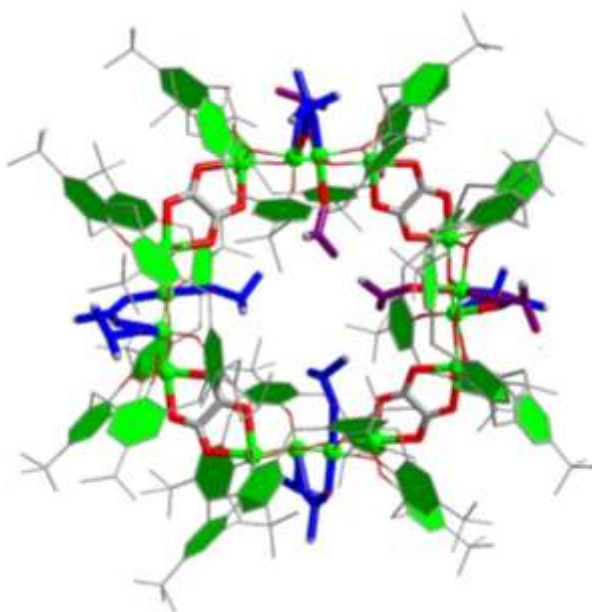

**Figure S56.** Crystallographic data of **Ti<sub>16</sub>L<sub>4</sub>-1** after photocatalytic reaction (after five cycle).

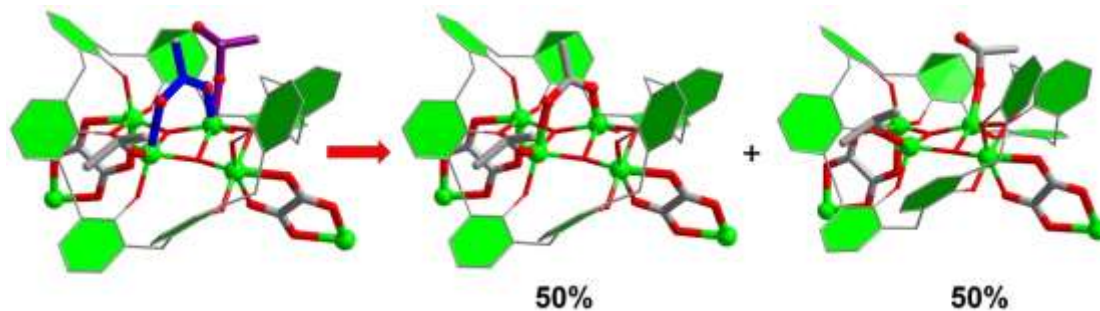

**Figure S57.** Crystallographic data of **Ti<sub>16</sub>L<sub>4</sub>-1** after photocatalytic reaction (after five cycle).

Discussion: After the photocatalytic reaction, the macrocyclic structure of **Ti<sub>16</sub>L<sub>4</sub>-1** remained stable, but the surface ligand changed. The ligands in the two {Ti<sub>4</sub>-TBC[8]} subunits remain unchanged and are still occupied by one  $\mu_2$ -bridging acetate and two  $i\text{PrO}^-$  groups. However, in the other two {Ti<sub>4</sub>-TBC[8]} subunits, the coordination mode of half of the acetate groups changed.

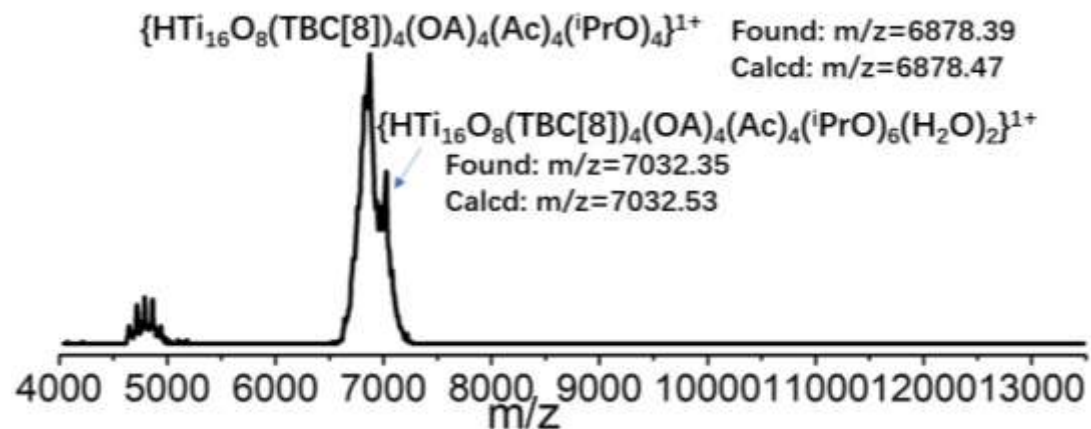

Figure S58. Positive-mode MALDI-TOF-MS spectrum of the crystalline sample of **Ti<sub>16</sub>L<sub>4</sub>\_1** after five catalytic cycle.

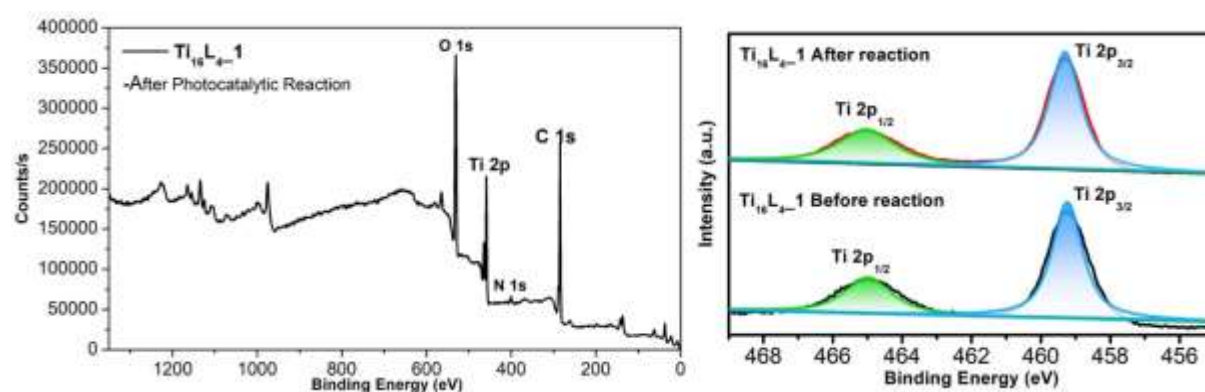

Figure S59. XPS of **Ti<sub>16</sub>L<sub>4</sub>\_1** after catalysis tests.

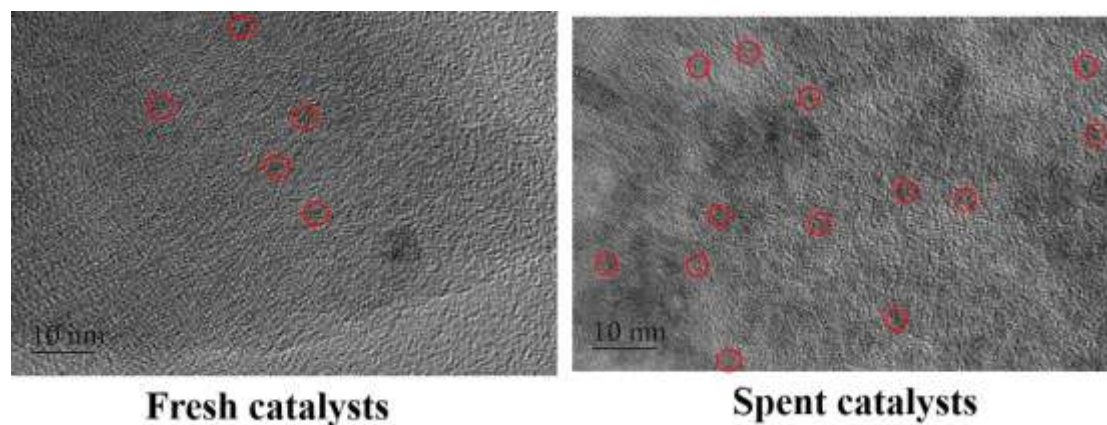

Figure S60. TEM image of **Ti<sub>16</sub>L<sub>4</sub>\_1** before and after reaction.
